1           **COGNITIVE DOMAINS FUNCTION COMPLEMENTATION**

2                           **BY *NTNG* GENE PARALOGS**

3

4 Pavel Prosselkov<sup>1,2\*</sup>, Denis Polygalov<sup>3</sup>, Qi Zhang<sup>1</sup>, Thomas J. McHugh<sup>3</sup>, and Shigeyoshi  
5 Itohara<sup>1\*</sup>

6

7 <sup>1</sup>Laboratory of Behavioral Genetics, RIKEN Brain Science Institute, Wakoshi, 351-0198  
8 Saitama, Japan

9 <sup>2</sup>Graduate School, Department of Veterinary Medicine, Faculty of Agriculture, Tokyo  
10 University, 113-8657 Tokyo, Japan

11 <sup>3</sup>Laboratory of Circuit and Behavior Physiology, RIKEN Brain Science Institute, 351-0198  
12 Saitama, Japan

13

14 \*corresponding authors:

15           prosselkov@brain.riken.jp

16           sitohara@brain.riken.jp

17

18   Keywords: gene duplication, evolution, subfunctionalisation, cognitive complement

19 **ABSTRACT**

20 **Gene duplication was proposed by S. Ohno (Ohno, 1970) as a key mechanism of a gene**  
21 **function evolution. A pair of gene paralogs, *NTNG1* and *NTNG2*, sharing identical gene**  
22 **and protein structures and encoding similar proteins, forms a functional complement**  
23 **subfunctionalising (SF) within cognitive domains and forming cognitive**  
24 **endophenotypes, as detected by Intellectual Quotient (IQ) tests (Prosselkov et al., in**  
25 **press). *NTNG* paralogs are associated with autism spectrum disorder (ASD), bipolar**  
26 **disorder (BD) and schizophrenia (SCZ), with unique non-overlapping segregation**  
27 **among the other 15 cognitive disorders (CD), emphasizing an evolutionary gain-**  
28 **dependent link between advanced cognitive functions and concomitant cognitive**  
29 **pathologies. Complementary expression and human brain transcriptome composition of**  
30 **the paralogs explains the observed phenomena of their functional complementarity. The**  
31 **lowest identity among *NTNGs* is found in a middle of encoded by them proteins**  
32 **designated as unknown (Ukd) domain. *NTNG1* contains anthropoid-specific constrained**  
33 **regions and both genes contain non-coding conserved sequences underwent accelerated**  
34 **evolution in human. *NTNG* paralogs SF perturbrates “structure drives function” concept**  
35 **at protein and gene levels. Their function diversification results in a so-called**  
36 **“Cognitive Complement (CC)” formation, a product of gene duplication and**  
37 **subsequent cognitive subfunction bifurcation among the *NTNG* gene duplicates.**

38

38 INTRODUCTION

39 Gene duplication was proposed by S. Ohno (**Ohno, 1970**) as a key mechanism of a gene  
40 function evolution. Complex behaviors arise from a combination of simpler genetic modules  
41 that either have evolved separately or co-evolved. Many genes and the proteins they encode  
42 have been found to be involved in the cognitive information processing with a single variant  
43 or a single gene generally accounting for only a partial phenotypic variation in a complex  
44 trait. Cognitive processing as a quintessence of the brain functioning can be viewed as a  
45 product of intricately interlinked networks generated by deeply embedded into it players with  
46 specific or partially overlapping functions. The robustness of the cognitive processing  
47 towards its single elements genetic eliminations (to study their function) and its simultaneous  
48 fragility expressed in the multiple forms of neurological disorders manifest the existence of  
49 cognitive domains interlocked but SF within a unit of cognition formed upon these domains  
50 interaction. Previously, we have described a function of a pair of gene paralogs (*NTNG1* and  
51 *NTNG2*) involved in human IQ tests performance and underwent hominin-specific  
52 evolutionary changes (**Prosselkov et al., in press**). Hereby, we continue looking at these  
53 genes paralogs features focusing on underlying mechanisms of their function segregation and  
54 complementation within the cognitive domains.

55

## 55 RESULTS

56           The observed phenomena of functional complementation among the *NTNG* paralogs  
57 within cognitive domains (**Prosselkov et al., in press**) is also manifested in *NTNG*-associated  
58 human pathologies diagnosed in most cases (if only not in all) by a cognitive decline (**Figure**  
59 **1A-1** and **A-2**). Both genes are associated with BD and SCZ – devastating disorders sharing  
60 similar etiology (**Lee et al., 2013**) with genetic correlation by multivariate analysis of 0.590  
61 (**Maier et al., 2015**), linked to human creativity (**Power et al., 2015**), and characterized by  
62 impulsiveness as a common diagnostic feature (**Reddy et al., 2014**). Recently found  
63 associations of both paralogs with ASD (**Sanders et al., 2015**) supports the reported genetic  
64 correlation of 0.194 ASD/SCZ pair (**Maier et al., 2015**) and shared module eigengenes  
65 detected by PC1 among these two disorders (**Parikshak et al., 2015**). 12 *NTNG1*-linked CDs,  
66 ranging from AD to TS, span a broad spectrum of clinical features frequently involving  
67 reduced processing speed (PS) and verbal comprehension (VC, **Figure 1A-1**). As for *NTNG2*,  
68 working memory (WM) deficit and inability “to bind” events (perceptual organization, PO)  
69 are the most prominent diagnostic traits for the SLE and TLE patients (**Figure 1A-2**), with  
70 PN characterised by indolent behavior in 90% of the cases (**Cavard et al., 2009**). Thus, both  
71 *NTNG* paralogs are associated with a variety of CDs and mostly in a non-overlapping manner,  
72 except for ASD, BD and SCZ characterized by shared and wide spectrum of cognitive  
73 abnormalities. The clinical etiology of the aforementioned diseases supports the IQ-deduced  
74 functional complementation among the *NTNG* paralogs (**Prosselkov et al., in press**) with  
75 (VC/PS) and (WM/PO) deficits being also uniquely segregated among the associated  
76 cognitive pathologies.

77           Since both genes are expected to have identical gene exon/intron compositions but  
78 different in their intron lengths (**Yin et al., 2002**) we have reconstructed the paralogs  
79 transcriptomes by re-processing the publicly available RNA-seq dataset (**Wu et al., 2012**)

80 from healthy and SCZ human subjects superior temporal gyrus (STG) post-mortem brain  
81 tissue (Supplementary Table 1a=**ST1a**). A difference is noted instantly at the total expression  
82 levels (genes, exons, individual RNA transcripts) when two gene paralogs are compared  
83 (**Figure 1B-1** and **B-2**). *NTNG2* amount (as a whole gene) is 5 times larger comparing to  
84 *NTNG1*; exons (2-5) are 3 times, exons (8-9) are 18 times and exon 10 is 4 times higher  
85 expressed for *NTNG2* than for *NTNG1*. The only two exons outlaying the prevailing amount  
86 rule for the *NTNG2* mRNAs are exons 6 and 7, expressed nearly at the same absolute level as  
87 for the *NTNG1* exon paralogs, making them highly underrepresented within the whole  
88 *NTNG2* transcriptome. Next, distinct non-alternating splicing modules are formed by exons  
89 (2-5) for *NTNG1* (**Figure 1B-1**), while exons (4-5) and exons (8-9) for *NTNG2* (**Figure 1B-**  
90 **2**). Two structurally identical RNA transcript paralogs (*NTNG1a* = G1a and *NTNG2a* = G2a)  
91 have been found to exist in both *NTNG* transcriptomes with G2a being expressed at 8-9 times  
92 higher level than G1a. *NTNG1* is uniformly presented across the all analysed 16 human  
93 samples by 2 more protein coding RNAs (G1c and G1d, detected previously in mice brain,  
94 **Nakashiba et al., 2000**) and by 2 non-coding intron (9-10) derived transcripts (**Figure 1B-1**).  
95 At the same time, *NTNG2* transcriptome is comprised of one extra potentially coding RNA  
96 (G2a-like with exon 2 spliced out but in-frame coding preserved) and 2 assumed to be non-  
97 coding RNAs with exons 6 and 7 retained along with preceding and following them introns.  
98 Quite interesting that these two latter transcripts are the only RNA species with *NTNG2* exon  
99 6 and 7 retained (**Figure 1B-2**). Two more coding (G1f and G1n) and 4 more non-coding for  
100 *NTNG1* and 9 extra non-coding for *NTNG2* RNA species have been also assembled from the  
101 available reads but due to inconsistency in their appearance across all 16 STG samples they  
102 are not presented on the figure but summarized in the table (**Figure 1C**, for details refer to  
103 **ST1d**). Summarising above said, it can be concluded that quantitative and qualitative  
104 complementary differences is a prominent feature characterising the brain RNA

105 transcriptome of human *NTNG* paralogs. However, no significant changes at the  
106 transcription level of neither whole genes, nor individual exons, nor reconstructed RNA  
107 transcripts have been found for SCZ and healthy subjects.

108       Upon calling the presence of IQ-affecting SNPs (**Prosselkov et al., in press**) across  
109 all STG samples (**ST1c**) it has been revealed that 15 out of 16 subjects were positive for the  
110 T-allele of rs2149171 (exon 4-nested), shown above to attenuate the WM score in SCZ  
111 patients, making a comparison among the allele carrier *vs* non-carrier impossible. Four  
112 healthy and three SCZ samples carry a T-allele of rs3824574 (exon 3-nested, non-affecting  
113 IQ), and 1 healthy and 1 SCZ sample each contains a C-allele of rs4915045 (exon10, non-  
114 coding part-nested, and non-affecting IQ). Thus, among the eleven cognitive endophenotype-  
115 associated SNPs only 3 were possible to call out of the available *NTNG* transcriptome.

116       Distinctly complementary nature of the *NTNG* paralogs segregation within  
117 neurological disorders and RNA transcriptome usage in STG (**Figure 1**) has prompted us to  
118 analyse both genes expression across the entire human brain. We have reconstructed both  
119 genes expression profiles in the human brain areas over the life span from conception (pcw =  
120 post-conception week) to mature age (30-40 yrs old) using the RNA-seq data from BrainSpan  
121 ([www.brainspan.org](http://www.brainspan.org)). Similarities and differences are easily noted when the age-dependent  
122 phases of *NTNG1* and *NTNG2* expression profiles are matched (**Figure 2**). Based on the  
123 visual inputs three distinct classifiers have been elaborated: 1. predominantly synchronous  
124 (**Figure 2A(1-4)**), characteristic mostly for the cortical areas; 2. predominantly mixed and  
125 asynchronous (**Figure 2B**), characteristic for the cerebellar cortex and subcortical formations;  
126 and 3. anti-phasic (complementary, **Figure 2C**), characteristic for the MD of thalamus and  
127 hippocampus. All analysed brain areas demonstrated an elevated level of *NTNG2* expression  
128 in comparison to *NTNG1* except for thalamus (**Figure 2C**) with the largest difference  
129 observed is at the time of birth (35-37 pcw) or soon after (4 mo) for the synchronous

130 classifiers (**Figure 2A**), oscillating increment values across the life span for the mixed  
131 (**Figure 2B**) and anti-phasic (**Figure 2C**) classifiers. It is quite intriguing to note that  
132 essentially all brain areas show a trend towards the expression difference being negated  
133 between the paralogs by reaching the mature age of 30-40 yrs old (nearly or above the mean  
134 age used for the IQ testing), except MD where the expression discrepancy is increased. Thus,  
135 the observed functional complementation among the *NTNG* paralogs is supported by the  
136 anatomical distribution of the genes in human brain and their expression pattern modality  
137 over the human subjects lifetime.

138         A direct comparison of the *NTNG* paralogs shows not only identical intron-exon gene  
139 structure (**Figure 1B-1, 2B-2**) but also closely matched exon sizes (**Figure 3A**). There are  
140 three exons of identical sizes (exons 4, 8 and 9), another three exons differed by one encoded  
141 aa (exons 3, 5 and 6) and there are exons of different sizes (exons 2, 7 and 10). In terms of  
142 size the largest difference among the genes is visually presented by the introns: intron (9-10)  
143 of *NTNG1* is 52.7 times larger its *NTNG2* paralogous intron with intron (6-7) of *NTNG1*  
144 being only 1.43-times larger pointing towards non-equilibria process of non-coding elements  
145 elaborations as the process of gene paralogs SF proceeded. Nevertheless, it can be  
146 generalised that in average all *NTNG1* introns are several times larger their *NTNG2* analogs  
147 (**Figure 3A**). We have shown previously that exons 6 and 7 are differentially used within the  
148 brain *NTNG* transcriptome (**Figure 1B-1 and B-2**) and to explore their potential contribution  
149 into the paralogs SF we have built identity matrices with these exons excluded and included  
150 (but still producing in-frame existing transcripts, **Figure 3B-1** left and right panels,  
151 respectively). Exclusion of both exons from the full-lengths transcripts (thus converting  
152 *NTNG1m* to *NTNG1a* and *NTNG2b* to *NTNG2a*, respectively) increases the identity of DNA  
153 on 2% (a relatively large effect since both exons together represent only 7.22 and 9.69% of  
154 the total coding part of the full-length RNA transcripts, *NTNG1m* and *NTNG2b*, respectively).

155 This effect becomes even stronger when the encoded by these transcripts proteins are also  
156 compared (**Figure 3B-2**). The spliced out Ukd protein domains (encoded by the exons 6 and  
157 7) increases the proteins identity on 3.8% thus making the middle of both genes (and encoded  
158 proteins) substantially more different among the both gene paralogs. To corroborate this  
159 observation and to explore the importance of other protein parts we have directly compared  
160 the sequences encoded by the full-length transcripts and producing Netrin-G1m and Netrin-  
161 G2b (**Figure 3C**). Similarly to what has been shown on **Figure 3B-1** and **3B-2**, the lowest  
162 identity (17.5%) is represented by the Ukd domain (encoded by the exons 6 and 7) and by the  
163 preceding it exon 5 (a 3'-part of the LE1 domain). Two other areas also show a substantially  
164 low identity, namely the N-terminus (it includes the protein secretory signal indicated by an  
165 arrow) and the outmost C-terminus responsible for the unique feature of Netrin-Gs – the GPI  
166 attachment. Thus, based on the percent identity comparisons among the Netrin-G paralogs it  
167 can be predicted that there are several potential protein parts contributing to the paralogs SF.  
168 As it has been reported by **Seiradake et al. (2011)**, identical gene and protein domain  
169 compositions result in the identical structural motif with differences only in the spatial  
170 arrangement of the loops facing the post-synaptic Netrin-G's interacting partners, NGL-1 and  
171 NGL-2, respectively (**Figure 3D**). Loop I binding surfaces alignment (**Figure 3C**, blue color)  
172 shows a high level of conservation (with at least 5 amino acids 100% conserved) among the  
173 Netrin-G paralogs, indicating that it is unlikely to be responsible for the cognate ligand  
174 binding specificity. Neither Loop II (**Figure 5C**, yellow color) nor Loop III (**Figure 5C**,  
175 orange color) display a single conserved amino acid shared among the paralogous binding  
176 interfaces (as it originally has been described in **Seiradake et al., 2011**). Thus the  
177 complementary pattern of the pre-postsynaptic interactions mediated via specific Netrin-  
178 G/NGL pairs is reflected in the reciprocally different sizes of the loops binding interfaces  
179 representing another element of the *NTNG*-encoded protein paralogs SF.

180



180 DISCUSSION

181 **Complementary contribution of *NTNG* paralogs into human cognitive pathologies.**

182 Involvement of the pre-synaptically expressed axon-localised *NTNGs* in SCZ diagnosis  
183 supports the established view of SCZ as a result of distorted trans-synaptic signaling (**Lips et**  
184 **al., 2012**), with a recent study proving that axonal connectivity-associated genes form a  
185 functional network visualisable by fMRI (**Richiardi et al., 2015**), and that brain connectivity  
186 predicts the level of fluid intelligence (**Finn et al., 2015; Pamplona et al., 2015**). Both  
187 *NTNGs* have been found to participate in the brain functional connectivity by the parcellated  
188 connectome reconstruction ((**Hawrylycs et al., 2015**). Most of the reported disease  
189 associations link *NTNG1* to SCZ with a variety of other neurologic pathologies (15 in total,  
190 **Figure 1A-1**), while *NTNG2* pathologic associations (6 in total, **Figure 1A-2**) are quite  
191 limited to those affecting WM or PO. Among them is SLE frequently characterized by WM  
192 deficit (**Shucard et al., 2011**) and also known to represent schizoid-type abnormalities  
193 characteristic for autoimmune pathologies (**Guilloux et al., 2010; Eaton et al., 2006**).  
194 Immune activation is known to lead to altered pre-pulse inhibition (a key diagnostic trait for  
195 SCZ) reversed by antipsychotics (**Romero et al., 2007**). The three diseases associated with  
196 both paralogs (ASD, BD and SCZ) are also a primary focus of the recently initiated  
197 PsychENCODE project (**PsychENCODE et al., 2015**). It is also worth to mention the  
198 resemblance of the reported disease associations with the behavioral phenotypes of *Ntng1*  
199 and *Ntng2* gene knockout mice (**Qi et al., in press**).

200 It is a known fact that a gene content associated with IQ score often relates to  
201 numerous diseases, such as SCZ, ASD, depression, and others (see **Zhao et al., 2014** for ref.).  
202 Several genes associated with SCZ have undergone positive selection following the human  
203 brain evolution (**Xu et al., 2015**). Despite the global network properties of the brain  
204 transcriptome are highly conserved among the species there are robust human-specific

205 disease-associated modules (**Miller et al., 2010**) and human accelerated regions (HARs) -  
206 highly conserved parts of genome that underwent accelerated evolution in humans (**Pollard**  
207 **et al., 2006**). HARs can serve as genomic markers for human-specific traits underlying a  
208 recent acquisition of modern human cognitive abilities by brain (**Boyd et al., 2015**) but that  
209 also “might have led to an increase in structural instability... resulted in a higher risk for  
210 neurodegeneration in the aging brain” (**Zhou et al., 2015**), rendering our intellectual abilities  
211 genetically fragile (**Crabtree, 2013**) and resulting in a variety of CDs. The role genomic  
212 context, epistasis (**Hemani et al., 2014**), plays in the evolution and pathology is manifested  
213 by frequently found disease-causing alleles present in animals without obvious pathological  
214 symptoms for the host (**Jordan et al., 2015**). Any CD is characterized by general intellectual  
215 disability (GID) plus psychiatric symptoms. A genetic perturbation-exerted behavioral  
216 cognitive deficit (BCD) in an animal model organism is a poor match to a human CD *per se*  
217 due to very poor contextual resemblance between the human GID and animal BCD together  
218 with the absence of interpretable psychiatric symptoms. No wonder that the compounds that  
219 “cure” mice models consistently fail in human trials (discussed in **Hyman, 2014**).

220 ***NTNG* paralogs brain transcriptome intrinsic complementarity and possible mechanism**  
221 **for the IQ-affecting mutation alleles effect.** There is no global change at the mRNA level  
222 between healthy subjects and SCZ patients (**Figure 1B**). This conclusion is supported by  
223 previously published works stating that globally altered mRNA expression of *NTNG1* or  
224 *NTNG2* is unlikely to confer disease susceptibility, at least in the temporal lobe (**Eastwood**  
225 **and Harrison, 2008**), and Brodmann’s area (**Aoki-Suzuki et al., 2005**). However, the  
226 original paper-source of the STG samples RNA-seq along with many other genes (>1,000)  
227 found that *NTNG1* (but not *NTNG2*) falls under the group of genes with significant  
228 alternative promoter usage (**Wu et al., 2012: ST6,  $p < 9.05E-10$  at FDR < 0.5**) and *NTNG2*  
229 (but not *NTNG1*) clusters with genes (>700) with significant alternative splicing change (**Wu**

230 **et al., 2012: ST7**,  $p < 6.15E-12$  at  $FDR < 0.5$ ) when SCZ and controls are compared. Such  
231 GWAS observation adds an extra layer of complementary regulation to both *NTNG* paralogs  
232 on a top of the described in the results section complementary usage rule for the exons,  
233 formed unspliced splicing modules, resulting transcripts and their comprising exons (**Figure**  
234 **1B**). Based on the available RNA-seq dataset it was almost impossible to detect RNA with  
235 the matched position of *NTNG* SNPs used for the IQ testing (**ST2c** and **Prosselkov et al., in**  
236 **press**) except for two coding exons located (rs2149171 and rs3824574) and exon 10 non-  
237 coding area located but transcribed rs4915045 (in 2 out of 16 samples). This fact points  
238 towards indirect effect of the IQ-affecting mutation alleles which can be associated with the  
239 shorter (secretable) isoforms generation (**Prosselkov et al., unpublished**) lacking two of the  
240 most prominent *NTNG* features: GPI-link and the Ukd domain through an aberrant splicing  
241 factor binding. The GPI-link is a hallmark of Netrin-G family members (**Nakashiba et al.,**  
242 **2000, 2002**) and without it the aberrant Netrin-G isoforms are likely to mimic the action of  
243 their releasable ancestry molecules - netrins, still being able to bind to their cognate  
244 postsynaptic ligand – NGL but without forming an axonal-postsynaptic contact. The Ukd  
245 domain of Netrin-G1, despite its so-far unknown function, is involved in lateral binding to  
246 the pre-synaptically localised LAR modulating the binding strength between NGL-1 and  
247 Netrin-G1 (**Song et al., 2013**). Work is currently underway in search for a similar lateral  
248 interaction partner for the Netrin-G2 Ukd domain (**Kim E, personal communications, April**  
249 **2014**). The inclusion of Ukd encoding exons 6 and 7 is regulated by the Nova splicing factor  
250 (**Ule et al., 2005**) affecting the cortex Netrin-G1 exon 7 but not exon 6, and, simultaneously,  
251 Netrin-G2 paralog exons exhibiting an opposite pattern. In general, it is tempting to speculate  
252 that deregulation of *NTNG* transcripts processing may have a role in the brain-controlled  
253 cognitive abilities and associated CDs. Supporting such notion, a decreased level of Netrin-  
254 G1c mRNA (exons 6-9 excluded, **Figure 1B-1**) has been reported for BD and SCZ

255 (Eastwood and Harrison, 2008) with Netrin-G1d (exons 6 and 7 included but 8-9 excluded,  
256 **Figure 1B-1**) and Netrin-G1f (a secretable short isoform consisted of domain VI only and  
257 lacking the Ukd and GPI-link) being increased in BD, but not in SCZ, in anterior cingulate  
258 cortex (Eastwood and Harrison, 2010). Higher Netrin-G1d mRNA expression in fetal brain  
259 but low for the Netrin-G1c isoform in the human adult (Eastwood and Harrison, 2008)  
260 indicates different functionality of these two splice variants joggling with the Ukd domain  
261 inclusion. And, according to our data in the forthcoming manuscript, if Netrin-G1 Ukd-  
262 containing isoforms are the dominant isoforms in adult mouse brain, Netrin-G2 Ukd-  
263 containing isoforms are present at the trace level (Prosselkov et al., forthcoming),  
264 resembling a similar transcriptome pattern for the human STG samples (**Figure 1B-1 and B-**  
265 **2**). A similar “dynamic microexon regulation” associated with the protein interactome  
266 misregulation has been reported to be linked to ASD (Irimia et al., 2014).

267 **Synchronous and complementary expression of *NTNG* paralogs in the human brain**  
268 **supports the IQ-associated cognitive endophenotypes.** Influential parieto-frontal  
269 integration theory (P-FIT, Jung and Haier, 2007) states that general intelligence (“g”)  
270 depends on multiple brain cortical areas such as dlPFC, Broca's and Wernicke's areas,  
271 somatosensory and visual cortices (Colom et al., 2009). Despite “g” is widely accepted as the  
272 only correlate of the intelligence, its unitary nature was challenged by (Hampshire et al.,  
273 2012) claiming had indentified two independent brain networks (for memory and for  
274 reasoning) responsible for the task performance, the idea later criticised for the employed  
275 data processing approach (Haier et al., 2014). Higher IQ scores (a composite surrogate of  
276 “g”) have been reportedly associated with the fronto-parietal network (FPN) connectivity  
277 (Song et al., 2008; Glascher et al., 2009). High level of *NTNG* paralogs expression within  
278 the cognition intensively loaded areas of the brain and the distinct patterns of expression  
279 profiles (synchronous, asynchronous/mixed, and complementary, **Figure 2A**) support

280 associations of *NTNG1* and *NTNG2* with the recorded cognitive endophenotypes (**Prosselkov**  
281 **et al., in press**). Based on the expression patterning over the human life-span, among the  
282 total 16 analysed brain areas we found two falling under the same “anti-phasic  
283 (complementary)” classifier (**Figure 2C**): HIP and MD. Adding more to that, MD is the only  
284 brain area (out of the 16 presented) where *NTNG1* expression level exceeds that of *NTNG2*  
285 making it a promising candidate for the phenomena of *NTNGs* SF explanation. Two other  
286 brain areas classified by a synchronous paralogs expression deserve a special attention,  
287 dlPFC and mPFC (**Figure 2A-4**). PFC circuitry has been known as a “hub of the brain’s WM  
288 system” (**Kim et al., 2013; Markowitz et al., 2015**), which acts through direct HIP afferents  
289 (**Spellman et al., 2015**) and has many connections with other cortical and subcortical areas  
290 (**Riga et al., 2014**). mPFC may function as an intelligence-control switchboard and IPFC,  
291 part of the FPN global connectivity, predicts the WM performance and fluid intelligence  
292 (**Cole et al., 2012**). Interactions of the auditory recognition information fed by the vPFC  
293 stream with the sequence processing by the dorsal stream are crucial for the human language  
294 articulation (**Skeide and Friederici, 2015**). The fact that both *NTNG* paralogs are extensively  
295 expressed across PFC (**Figure 2A-2 and A-4**) pinpoints this area as a key for future  
296 molecular studies of the human-unique symbolic communications. And PFC is not only  
297 implicated in many psychiatric disorders, including SCZ (**Gulsuner and McClellan, 2014;**  
298 see also **Riga et al., 2014** for ref.), but is also the only brain structure unique to primates  
299 without known homologs in the animal kingdom (**Wise, 2008**).

300 **Evolution of the protein paralogs encoded by the *NTNGs*.** Forkhead box P2 (FOXP2) – a  
301 ubiquitously expressed transcription factor that has been reported to be linked to the  
302 evolution of human language through T303N, N325S substitutions when compared to a  
303 primate ortholog (**Enard et al., 2002**) and is 100% identical to Nea protein (**Krause et al.,**  
304 **2007**). FOXP2 regulates the expression of multiple genes and among them is *LRRC4C* (gene

305 encoding NGL-1 – a post-synaptic target of Netrin-G1) in human and chimpanzee (**Konopka**  
306 **et al., 2009**). Netrin-G1 similarly to FOXP2 is a 100% conserved protein among the  
307 hominins with only 1 mutation found in chimpanzee which is absent in marmoset (and other  
308 primates) and mice proteins (**Prosselkov et al., in press**). On the other hand, extinct  
309 hominins' Netrin-G2 relative to modern human contains T346A point mutation (as per  
310 current version of hg19), also found in primates and mouse and known as rs4962173 (dbSNP  
311 missense mutation) representing an ancient substitution from Nea genomes found in modern  
312 humans and reflecting a recent acquisition of the novel allele in Ice around 5,300 yrs BC.  
313 Nothing is known regarding the functional significance of this mutation but biochemically a  
314 substitution of alanine (A) on a polar threonine (T) could bring an extra point of regulation,  
315 e.g. a phosphorylation or glycosylation (NetPhos2.0 (**Blom et al., 1999**) assigns a low score  
316 for the T346 to be phosphorylated but NetOGlyc4.0 (**Steentoft et al., 2013**) robustly predicts  
317 it to be glycosylated, **SM**). Another mutation S371A/V reflects a selective sweep in Netrin-  
318 G2 protein from primates to hominins within a similar to T346A functional context when a  
319 hydrophobic alanine (in chimpanzee, A)/valine (in marmoset, V) is replaced by a polar serine  
320 (S) and a strong positive predictions for glycosylation but not phosphorylation (**SM**). This  
321 poses a question whether these two human-specific protein substitutions associate with  
322 advanced cognitive traits as they may represent a hidden layer of poorly studied so far protein  
323 glycosylation-associated regulatome known to affect the brain function and diseases  
324 (**Baenziger, 2012; Baenziger, 2013**). Adding more to this, T346 is nested on exon 5 just 20  
325 nu away from the affecting WM score rs2274855 (**Prosselkov et al., in press**), and, together  
326 with S371A/V, they are both located within the lowest percent identity area (exons (5-7)) of  
327 Netrin-Gs (**Figure 3C**) and, proposedly, contributing to the *NTNG* duplicates SF. There are at  
328 least three more protein parts potentially contributing to the gene paralogs specialised  
329 function subdivision (based on the low identity scores, **Figure 3C**): the secretory peptide, the

330 GPI-link, and the outmost structurally elaborated unstructured loops (I-III) responsible for the  
331 reciprocal binding of Netrin-Gs to their post-synaptic cognate partners, NGL-1 or NGL-2,  
332 both containing a C-terminal PDZ-binding domain (**Kim et al., 2006**). An interesting finding  
333 was reported in (**Arbuckle et al., 2010**) found a presence of SH3(PSD95) domain binding  
334 site (required for the phosphatidylinositol-3-kinase recruitment) in mice Netrin-G2 (100%  
335 identical to human) but not in Netrin-G1. The detected SH3 binding site overlaps with the  
336 Netrin-G2-loop III responsible for the binding specificity to NGL-2 (**Seiradake et al., 2011**;  
337 **Soto et al., 2013**; **DeNardo et al., 2012**). A plausible working hypothesis would be that  
338 while internalised (and being GPI-link naïve/immature) the pre-synaptic Netrin-G2 is bound  
339 to SH3-PSD95 via loop III but as soon as being secreted extracellularly (and being attached  
340 to the membrane) it is bound to post-synaptic NGL-2. Corroborating this, in the absence of  
341 Netrin-G2 in the KO mice NGL-2 is unstable on the post-synaptic surface and gets quickly  
342 internalized (**Qi et al., in press**). We can only speculate regarding the potential importance of  
343 PSD-95(SH3)-Netrin-G2-NGL-2 scaffolding loop interaction/competition but the ability for  
344 Netrin-G1 to bind to SH3 has not been reported. Following this logic, Netrin-G1 should have  
345 a similar binding partner via loop II while internalised.

346       The overall identical structural scaffold among the Netrin-G paralogs (**Figure 3D**) is  
347 likely to represent an anciently preserved one of the primordial protein (encoded by a single  
348 gene in the primitive urochordate *C.intestinalis*) and its contribution to the process of SF  
349 among the *NTNG* paralogs goes against the “structure drives function” concept. It looks like  
350 that it is not the “structure” but rather the “evolution” itself that drives a selection for the best  
351 structural (or unstructural in our case) fit out of the available frameworks provided by the  
352 gene duplicates to fulfill the emerged functional demand in a new ecological niche. The  
353 intricate variability of phenotype is grounded by the conserved nature of genotype and  
354 constrained by the “structure-function” limitations of the coding DNA and is only possible



355 due to permissive evolutionary continuing elaborations of non-coding areas able to absorb the  
356 most recently acquired elements (having a potential to become regulatory at some point, e.g.  
357 like HAR5 (**Boyd et al., 2015**)) and carried over by neutral drift as proposed by Kimura but  
358 for proteins (**Kimura, 1983**). At the same time, the multiple protein substitutions coinciding  
359 with the SF labor segregation phenomena among the Netrin-G paralogs question their neutral  
360 nature. Both of them undergo a purifying selection from mice to human through the reduction  
361 in size of non-coding DNA (introns) and encoded proteins (the mice Netrin-G2 is 2 aa longer  
362 its human ortholog) further contributing to the host-specific SF. Thus while the non-coding  
363 sequences are used to explore the evolutionary space in time, the restrictive boundaries of the  
364 paralogs SF are determined by the protein (unstructured) elements.

365 **Molecular evolution of the Cognitive Complement (CC).** Appearance of the neural crest  
366 (**Abitua et al., 2012**), an event that “affected the chordate evolution in the unprecedented  
367 manner” (**Green et al., 2015**), multipotent progenitor cells (**Stolfi et al., 2015**), and  
368 neurogenic placodes (suggesting a chemosensory and neurosecretory activities, **Abitua et al.,**  
369 **2015**) in first primitive urochordates/tunicates coincides with the presence of *Ntn* precursor  
370 gene (ENSCING00000024925) later undergoing two rounds of duplication events in lamprey  
371 and found to affect human cognitive abilities (**Prosselkov et al., in press**). *NTNG* paralogs  
372 are expressed in the human neural crest-forming cells with *NTNG2* 10 times stronger than  
373 *NTNG1* (**Rada-Iglesias et al., 2012**), both are differentially expressed in human comparing to  
374 chimpanzee and rhesus monkey with *NTNG2* expression model showing stronger probability  
375 than *NTNG1* (**Iskrow et al., 2012**), and both are stronger expressed in human telencephalon  
376 comparing to chimpanzee and macaque (**Konopka et al., 2012**). *NTNG1* has been classified  
377 as a brain module hub gene “whose pattern fundamentally shifted between species”  
378 (**Hawrylycs et al., 2015**). Belonging to distinct modules of brain expression regulation (**Liu**  
379 **et al., 2012, Konopka et al., 2012**), *NTNGs* are classified as “genes with human-specific



380 expression profiles” (Liu et al., 2012). The nearby gene ~260 kbp upstream of *NTNG2* is  
381 *MED27* (mediator of RNA polymerase II) has been proposed to be associated with the  
382 evolution of human-specific traits (McLean et al., 2011). *NTNG1* has also been reported  
383 among the “adaptive plasticity genes” (Ghalambor et al., 2015) potentiating rapid adaptive  
384 evolution in guppies (*NTNG2* was not found among the input RNA for analysis).

385 Complementarity among the *NTNG* paralogs and encoded by them proteins has been  
386 reported previously: brain expression complementary pattern (in almost self-exclusive  
387 manner) defined by the 5'-UTR-localised *cis*-regulatory elements (Yaguchi et al., 2014);  
388 complementary distribution within the hippocampal laminar structures (Nishimura-Akiyoshi  
389 et al., 2007); axon-dendrite synaptic ending resulting in differential control over the neuronal  
390 circuit plasticity (Matsukawa et al., 2014); mutually-exclusive binding pattern to post-  
391 synaptic partners, NGL-1 and NGL-2, dictated by the protein unstructural elements  
392 (Seiradake et al., 2011); alternative promoter usage vs alternative mRNA splicing in SCZ  
393 patients (Wu et al., 2012); KO mice behavioral phenotypes and subcellular signaling partners  
394 complementarity (Qi et al., in press); “differential stability” brain modules expression  
395 (*NTNG1* is expressed in the dorsal thalamus (M11) as a hub gene (Pearson’s 0.92) while  
396 *NTNG2* is in neocortex and claustrum (M6, Pearson’s 0.65)) (Hawrylycs et al., 2015);  
397 module top-down vs bottom-up information flows gating in mice and differential  
398 responsiveness to neuronal activity (Prosselkov et al., forthcoming); and human IQ-  
399 compiling cognitive domains complementation (Prosselkov et al., in press). The current  
400 study reports the *NTNGs* complementarity association with the CDs (Figure 1A); mRNA  
401 splicing pattern complementary at the quantitative and qualitative levels via differential use  
402 of the middle-located exons (Figure 1B); brain complementary oscillatory expression over  
403 the human life span observed in the intensive cognitively loaded brain areas (Figure 2); AE  
404 of the paralogs-segregated unique non-coding elements (Figure 3A); complementary pattern

405 of the protein orthologs (mice-to-human) protein sequence evolution. Such multi-level  
406 complementation is likely to reflect a shared evolutionary origin from a single gene in a  
407 primitive vertebrate organism 700 mln yrs ago and its subsequent functional segregation  
408 among the evolution-generated gene duplicates in jawless fish, such as lamprey.

409 Occupying independent but intercalating functional niches, *NTNG1* and *NTNG2* do  
410 not compensate but complement each other's function forming a "functional complement" of  
411 genes. Half a billion yrs ago the doubled gene dosage led to the gradual SF and manifested in  
412 a function complementation within the cognitive domains, at least in human. We would like  
413 to coin such gene pair as a Cognitive Complement (CC).

414

#### 415 CONCLUSION

416 The emerged functional redundancy, as an outcome of gene duplication, leads to function  
417 subdivision and its bifurcation among the gene paralogs resulting in the paralogs SF. A  
418 functional compensation is known to exist among the evolutionary unrelated genes but has  
419 not been reported among the gene paralogs, more frequently characterized by the function  
420 complementation. Gene paralogs structural identity (at both, gene and protein levels) does not  
421 provide a substrate for functional compensation but rather for complementation perturbing  
422 "structure drives function" rule. A gene duplication event of a tunicate *NTNG* primordial  
423 gene and the subsequent process of its function specialisation (driven by the new ecological  
424 niches appearance and evolution) among the gene duplicates made them to SF into distinct  
425 cognitive domains in a complementary manner forming a CC. In our forthcoming work we  
426 are to describe how *Ntng* mice genes function resembles that of human orthologs (**Prosselkov**  
427 **et al., forthcoming**).

428

## 428 MATERIALS AND METHODS

429 **Human brain *NTNG* transcriptome reconstruction.** Relates to **Figure 1B** and **1-C**. The  
430 original source of the dataset was produced by (**Wu et al., 2012**: E-MATB-1030) and the  
431 downloaded .bam files used for the re-processing are listed in **ST1a**. All reconstructed  
432 transcripts are presented in **ST1d** stand alone Excel file. Two samples were excluded from  
433 the analysis due to failed “per base sequence quality” measure, and zero expression level for  
434 *NTNG1a* and *NTNG1int(9-10)* otherwise consistently expressed throughout other samples  
435 (**ST1b**). SAMtools software was used for the SNPs calling from the available RNA-seq  
436 datasets (**ST1c**). For details refer to **SM**.

437 **Human brain expression profiling for *NTNGs* across the life span.** The original source of  
438 data was [www.brainspan.org](http://www.brainspan.org). All available samples were initially included into the analysis  
439 but two of them excluded at a later stage (MD for 12-13 pcw and mPFC for 16-19 pcw) due  
440 to high deviation (6-7 times) from the mean for other replicas. The mean expression values  
441 per each brain area as RPKM were plotted against the sampling age. Profiles classification  
442 was done visually considering the trend over the all plotted points as an average.

443 ***NTNG1 (NTNG1m)* and *NTNG2 (NTNG2b)* full-length mRNA transcripts assembly.**  
444 Relates to **Figure 3B**. Human *NTNG1m* brain transcript has been reported previously  
445 (**Meerabux et al., 2005**) and we have also confirmed its ortholog presence in the mice brain  
446 via full-length cloning (**Prosselkov et al., unpublished**). Since NCBI contains only its partial  
447 CDS (AY764265), we used the RNA-seq-generated exons (**Figure 1B**) to reconstruct its full-  
448 length and to generate an ORF of the encoded Netrin-G1m. Similarly, human *NTNG2b* was  
449 reconstructed from the RNA-seq dataset and from Ensemble as follows. Exon 5 sequence  
450 was deduced from ENST00000372179, other exons were from ENST00000467453 (no  
451 longer available on the current version of Ensemble) except for exon 6 deduced by running  
452 three independent alignments against the human genomic DNA with the mice 3'-intron (5-6),

453 exon 6, and 5'-intron (6-7) concomitantly confirmed by the generated full-length ORF for  
454 Netrin-G2b. The reconstructed protein was predicted to encode 587 amino acids, which is in  
455 a close proximity to the mice netrin-G2b ortholog of 589 residues (**Prosselkov et al., forth.**).  
456 **Full-lengths gene structures of *NTNG* paralogs reconstruction.** Relates to **Figure 3A.**  
457 Both, the obtained above from the STG brain samples RNA-seq and the reconstructed full-  
458 lengths transcripts carrying all stably expressed exons were used to confirm the intron-exon  
459 junctions positioning for *NTNG1* and *NTNG2*. Due to observed variability in the intron (1-2)  
460 and exon 10 sizes their boundaries were left unmarked.

461

#### 462 SUPPLEMENTARY MATERIALS (SM)

463 Contain Supplementary Methods (RNA-seq of STG re-processing and SNPs detection) and  
464 Supplementary Tables (**ST1a-d, ST2**) as a single compiled pdf file. Reconstructed RNA-seq  
465 (.gtf) of the STG is presented as a standalone Excel file (**ST1d**). Also included: Netrin-G2b  
466 predicted phosphorylation and *O*-glycosylation, Netrin-G1 vs Netrin-G2 Ukd alignment  
467 (**McWilliam et al., 2013**), predicted secretory peptide cleavage and GPI attachments.

468

#### 469 ACKNOWLEDGEMENTS

470 This work was in part supported by the “Funding Program for World-Leading Innovative  
471 R&D on Science and Technology (FIRST Program)” initiated by the Council for Science and  
472 Technology Policy (CSTP), and KAKENHI 15H04290 from the Japan Society for the  
473 Promotion of Science (JSPS). PP wants to express his heartfelt gratitude to staff of “Hello  
474 Work” Japan (Asakadai, Saitama-ken) for the prompt unemployment benefit processing.

475

#### 476 COMPETING INTERESTS

477 Authors would like to express a lack of any competing interests associated with the work.

478

478 REFERENCES

- 479 **Abitua PB**, Wagner E, Navarrete IA, Levine M. 2012. Identification of a rudimentary neural  
480 crest in a non-vertebrate chordate. *Nature* **492**:104-107. doi: [10.1038/nature11589](https://doi.org/10.1038/nature11589).
- 481 **Abitua PB**, Gainous TB, Kaczmarczyk AN, Winchell CJ, Hudson C, Kamata K, Nakagawa  
482 M, Tsuda M, Kusakabe, TG, Levine M. 2015. The pre-vertebrate origins of neurogenic  
483 placodes. *Nature* **524**:462-465. doi: [10.1038/nature14657](https://doi.org/10.1038/nature14657).
- 484 **Akula N**, Barb, J, Jiang, X, Wendland, JR, Choi, KH, Sen, SK, Hou, L, Chen, DTW, Laje, G,  
485 Johnson, K, Lipska, BK, Kleinman, JE, Corrada-Bravo, H, Detera-Wadleigh, S, Munson,  
486 PJ, McMahon, FJ. 2014. RNA-sequencing of the brain transcriptome implicates  
487 dysregulation of neuroplasticity, circadian rhythms and GTPase binding in bipolar  
488 disorder. *Molecular Psychiatry* **19**:1179-1185. doi: [10.1038/mp.2013.170](https://doi.org/10.1038/mp.2013.170).
- 489 **Aoki-Suzuki M**, Yamada K, Meerabux J, Iwayama-Shigeno Y, Ohba H, Iwamoto K, Takao  
490 H, Toyota T, Suto Y, Nakatani N, Dean B, Nishimura S, Seki K, Kato T, Itohara S,  
491 Nishikawa T, Yoshikawa, T. 2005. A Family-Based Association Study and Gene  
492 Expression Analyses of Netrin-G1 and -G2 Genes in Schizophrenia. *Biological Psychiatry*  
493 **57**:382–393. doi: [10.1016/j.biopsych.2004.11.022](https://doi.org/10.1016/j.biopsych.2004.11.022).
- 494 **Arbuckle MI**, Komiyama NH, Delaney A, Coba M, Garry EM, Rosie R, Allchorne AJ,  
495 Forsyth LH, Bence M, Carlisle HJ, O'Dell TJ, Mitchell R, Fleetwood-Walker SM, Grant  
496 SGN. 2010. The SH3 domain of postsynaptic density 95 mediates inflammatory pain  
497 through phosphatidylinositol-3-kinase recruitment. *Embo Reports* **11**:473-478. doi:  
498 [10.1038/embor.2010.63](https://doi.org/10.1038/embor.2010.63).
- 499 **Archer HL**, Evans JC, Millar DS, Thompson PW, Kerr AM, Leonard H, Christodoulou J,  
500 Ravine D, Lazarou L, Grove L, Verity C, Whatley SD, Pitz DT, Sampson JR, Clarke AJ.  
501 2006. *NTNG1* mutations are a rare cause of Rett syndrome. *American Journal of Medical*  
502 *Genetics Part A* **140A**:691-694. doi: [10.1002/ajmg.a.31133](https://doi.org/10.1002/ajmg.a.31133).

- 503 **Ayalew M**, Le-Niculescu H, Levey DF, Jain N, Changala B, Patel SD, Winiger E, Breier A,  
504 Shekhar A, Amdur R, Koller D, Nurnberger JI, Corvin A, Geyer M, Tsuang MT, Salomon  
505 D, Schork NJ, Fanous AH, O'Donovan MC, Niculescu AB. 2012. Convergent functional  
506 genomics of schizophrenia: from comprehensive understanding to genetic risk prediction.  
507 *Molecular Psychiatry* **17**:887-905. doi: [10.1038/mp.2012.37](https://doi.org/10.1038/mp.2012.37).
- 508 **Baenziger JU**. 2012. Moving the *O*-glycoproteome from form to function. *Proceedings of*  
509 *the National Academy of Sciences of the United States of America* **109**:9672–9673. doi:  
510 [10.1073/pnas.1206735109](https://doi.org/10.1073/pnas.1206735109).
- 511 **Baenziger JU**. 2013. *O*-mannosylation of cadherins. *Proceedings of the National Academy of*  
512 *Sciences of the United States of America* **110**:20858-20859. doi:  
513 [10.1073/pnas.1321827111](https://doi.org/10.1073/pnas.1321827111).
- 514 **Bisgaard A-M**, Rasmussen LN, Moller HU, Kirchhoff M, Bryndorf T. 2007. Interstitial  
515 deletion of the short arm of chromosome 1 (1p13.1p21.1) in a girl with mental retardation,  
516 short stature and colobomata. *Clinical Dysmorphology* **16**:109-112. doi:  
517 [10.1097/01.mcd.0000228425.89660.bf](https://doi.org/10.1097/01.mcd.0000228425.89660.bf).
- 518 **Blom N**, Gammeltoft S, Brunak S. 1999. Sequence and structure-based prediction of  
519 eukaryotic protein phosphorylation sites. *Journal of Molecular Biology* **294**:1351-1362.  
520 doi: [10.1006/jmbi.1999.3310](https://doi.org/10.1006/jmbi.1999.3310).
- 521 **Boraska V**, Franklin CS, Floyd JAB, Thornton LM, Huckins LM, Southam L, Rayner NW,  
522 Tachmazidou I, Klump KL, Treasure J, Lewis CM, Schmidt U, Tozzi F, Kiezebrink K,  
523 Hebebrand J, Gorwood P, Adan RAH, Kas MJH, Favaro A, Santonastaso P, Fernández-  
524 Aranda F, Gratacos M, Rybakowski F, Dmitrzak-Weglarz M, Kaprio J, Keski-Rahkonen A,  
525 Raevuori A, Van Furth EF, Slof-Op 't Landt MCT, Hudson JI, Reichborn-Kjennerud T,  
526 Knudsen GPS, Monteleone P, Kaplan AS, Karwautz A, Hakonarson H, Berrettini WH,  
527 Guo Y, Li D, Schork NJ, Komaki G, Ando T, Inoko H, Esko T, Fischer K, Männik K,

528 Metspalu A, Baker JH, Cone RD, Dackor J, DeSocio JE, Hilliard CE, O'Toole JK, Pantel  
529 J, Szatkiewicz JP, Taico C, Zerwas S, Trace SE, Davis OSP, Helder S, Bühren K,  
530 Burghardt R, de Zwaan M, Egberts K, Ehrlich S, Herpertz-Dahlmann B, Herzog W,  
531 Imgart H, Scherag A, Scherag S, Zipfel S, Boni C, Ramoz N, Versini A, Brandys MK,  
532 Danner UN, de Kovel C, Hendriks J, Koeleman BPC, Ophoff RA, Strengman E, van  
533 Elburg AA, Bruson A, Clementi M, Degortes D, Forzan M, Tenconi E, Docampo E,  
534 Escaramís G, Jiménez-Murcia S, Lissowska J, Rajewski A, Szeszenia-Dabrowska N,  
535 Slopian A, Hauser J, Karhunen L, Meulenbelt I, Slagboom PE, Tortorella A, Maj M,  
536 Dedoussis G, Dikeos D, Gonidakis F, Tziouvas K, Tsitsika A, Papezova H, Slachtova L,  
537 Martaskova D, Kennedy JL, Levitan RD, Yilmaz Z, Huemer J, Koubek D, Merl E,  
538 Wagner G, Lichtenstein P, Breen G, Cohen-Woods S, Farmer A, McGuffin P, Cichon S,  
539 Giegling I, Herms S, Rujescu D, Schreiber S, Wichmann H-E, Dina C, Sladek R,  
540 Gambaro G, Soranzo N, Julia A, Marsal S, Rabionet R, Gaborieau V, Dick DM, Palotie A,  
541 Ripatti S, Widén E, Andreassen OA, Espeseth T, Lundervold A, Reinvang I, Steen VM,  
542 Le Hellard S, Mattingsdal M, Ntalla I, Bencko V, Foretova L, Janout V, Navratilova M,  
543 Gallinger S, Pinto D, Scherer SW, Aschauer H, Carlberg L, Schosser A, Alfredsson L,  
544 Ding B, Klareskog L, Padyukov L, Courtet P, Guillaume S, Jausent I, Finan C, Kalsi G,  
545 Roberts M, Logan DW, Peltonen L, Ritchie GRS, Barrett JC, The Wellcome Trust Case  
546 Control Consortium 3, Estivill X, Hinney A, Sullivan PF, Collier DA, Zeggini E, Bulik  
547 CM. 2014. A genome-wide association study of anorexia nervosa. *Molecular Psychiatry*  
548 **19**:1084-1094. doi: [1085–1094](https://doi.org/10.1038/mp.2013.187). [10.1038/mp.2013.187](https://doi.org/10.1038/mp.2013.187).

549 **Borg I**, Freude K, Kubart SK, Hoffmann K, Menzel C, Laccone F, Firth H, Ferguson-Smith  
550 MA, Tommerup N, Ropers HH, Sargan D, Kalscheuer VM. 2005. Disruption of Netrin G1  
551 by a balanced chromosome translocation in a girl with Rett syndrome. *European Journal*  
552 *of Human Genetics* **13**:921-927. doi: [10.1038/sj.ejhg.5201429](https://doi.org/10.1038/sj.ejhg.5201429).



- 553 **Boyd JL**, Skove SL, Rouanet JP, Pilaz L-J, Bepler T, Gordân R, Wray GA, Silver DL. 2015.  
554 Human-Chimpanzee Differences in a FZD8 Enhancer Alter Cell-Cycle Dynamics in the  
555 Developing Neocortex. *Current Biology* **25**:772-779. doi: [10.1016/j.cub.2015.01.041](https://doi.org/10.1016/j.cub.2015.01.041).
- 556 **Cavard C**, Audebourg A, Letourneur F, Audard V, Beuvon F, Cagnard N, Radenen, B,  
557 Varlet P, Vacher-Lavenu M-C, Perret C, Terris B. 2009. Gene expression profiling  
558 provides insights into the pathways involved in solid pseudopapillary neoplasm of the  
559 pancreas. *Journal of Pathology* **218**:201-209. doi: [10.1002/path.2524](https://doi.org/10.1002/path.2524).
- 560 **Cole MW**, Yarkoni T, Repovs G, Anticevic A, Braver TS. 2012. Global Connectivity of  
561 Prefrontal Cortex Predicts Cognitive Control and Intelligence. *Journal of Neuroscience*  
562 **32**:8988-8999. doi: [10.1523/jneurosci.0536-12.2012](https://doi.org/10.1523/jneurosci.0536-12.2012).
- 563 **Colom R**, Haier RJ, Head K, Álvarez-Linerac J, Ángeles Quiroga M, Shih PC, Jung RE.  
564 2009. Gray matter correlates of fluid, crystallized, and spatial intelligence: Testing the P-  
565 FIT model. *Intelligence* **37**:124-135. doi: [10.1016/j.intell.2008.07.007](https://doi.org/10.1016/j.intell.2008.07.007).
- 566 **Crabtree GR**. 2013. Our fragile intellect. Part I. *Trends in Genetics* **29**:1-3. doi:  
567 [10.1016/j.tig.2012.10.002](https://doi.org/10.1016/j.tig.2012.10.002).
- 568 **DeNardo LA**, de Wit J, Otto-Hitt S, Ghosh A. 2012. NGL-2 Regulates Input-Specific  
569 Synapse Development in CA1 Pyramidal Neurons. *Neuron* **76**:762-775. doi:  
570 [10.1016/j.neuron.2012.10.013](https://doi.org/10.1016/j.neuron.2012.10.013).
- 571 **D’Gama AM**, Pochareddy S, Li M, Jamuar SS, Reiff RE, Lam A-TN, Sestan N, Walsh CA.  
572 2015. Targeted DNA Sequencing from Autism Spectrum Disorder Brains Implicates  
573 Multiple Genetic Mechanisms. *Neuron* **88**:910-917. doi: [10.1016/j.neuron.2015.11.009](https://doi.org/10.1016/j.neuron.2015.11.009).
- 574 **Eastwood SL**, Harrison PJ. 2008. Decreased mRNA expression of netrin-G1 and netrin-G2  
575 in the temporal lobe in schizophrenia and bipolar disorder. *Neuropsychopharmacology*  
576 **33**:933-945. doi: [10.1038/sj.npp.1301457](https://doi.org/10.1038/sj.npp.1301457).
- 577 **Eastwood SL**, Harrison PJ. 2010. Markers of Glutamate Synaptic Transmission and



- 578 Plasticity Are Increased in the Anterior Cingulate Cortex in Bipolar Disorder. *Biological*  
579 *Psychiatry* **67**:1010-1016. doi: [10.1016/j.biopsych.2009.12.004](https://doi.org/10.1016/j.biopsych.2009.12.004).
- 580 **Eaton WW**, Byrne M, Ewald H, Mors O, Chen CY, Agerbo E, Mortensen PB. 2006.  
581 Association of schizophrenia and autoimmune diseases: Linkage of Danish National  
582 Registers. *American Journal of Psychiatry* **163**:521-528. doi: [10.1176/appi.ajp.163.3.521](https://doi.org/10.1176/appi.ajp.163.3.521).
- 583 **Eisenhaber B**, Bork P, Yuan YP, Loffler G, Eisenhaber F. 2000. Automated annotation of  
584 GPI anchor sites: case study *C. elegans*. *Trends in Biochemical Sciences* **25**:340-341. doi:  
585 [10.1016/s0968-0004\(00\)01601-7](https://doi.org/10.1016/s0968-0004(00)01601-7).
- 586 **Enard W**, Przeworski M, Fisher SE, Lai CSL, Wiebe V, Kitano T, Monaco AP, Pääbo S.  
587 2002. Molecular evolution of *FOXP2*, a gene involved in speech and language. *Nature*  
588 **418**:869-872. doi: [10.1038/nature01025](https://doi.org/10.1038/nature01025).
- 589 **Finn ES**, Shen X, Scheinost D, Rosenberg MD, Huang J, Chun MM, Papademetris X,  
590 Constable RT. 2015. Functional connectome fingerprinting: identifying individuals using  
591 patterns of brain connectivity. *Nature Neuroscience* **online**. doi:[10.1038/nn.4135](https://doi.org/10.1038/nn.4135).
- 592 **Forbes NF**, Carrick LA, McIntosh AM, Lawrie SM. 2009. Working memory in  
593 schizophrenia: a meta-analysis. *Psychological Medicine* **39**:889-905. doi:  
594 [10.1017/s0033291708004558](https://doi.org/10.1017/s0033291708004558).
- 595 **Fukasawa M**, Aoki M, Yamada K, Iwayama-Shigeno Y, Takao H, Meerabux J, Toyota T,  
596 Nishikawa T, Yoshikawa T. 2004. Case-control association study of human netrin G1  
597 gene in Japanese schizophrenia. *Journal of Medical and Dental Sciences* **51**: 121-128.
- 598 **Ghalambor CK**, Hoke KL, Ruell EW, Fischer EK, Reznick DN, Hughes KA. 2015. Non-  
599 adaptive plasticity potentiates rapid adaptive evolution of gene expression in nature.  
600 *Nature* **525**:372-375. doi: [10.1038/nature15256](https://doi.org/10.1038/nature15256).
- 601 **Gilissen C**, Hehir-Kwa JY, Thung DT, van de Vorst M, van Bon BWM, Willemsen MH,  
602 Kwint M, Janssen IM, Hoischen A, Schenck A, Leach R, Klein R, Tearle R, Bo T, Pfundt

- 603 R, Yntema HG, de Vries BBA, Kleefstra T, Brunner HG, Vissers LELM, Veltman JA.  
604 2014. Genome sequencing identifies major causes of severe intellectual disability. *Nature*  
605 **511**:344-347. doi: [10.1038/nature13394](https://doi.org/10.1038/nature13394).
- 606 **Glascher J**, Tranel D, Paul LK, Rudrauf D, Rorden C, Hornaday A, Grabowski T, Damasio  
607 H, Adolphs R. 2009. Lesion Mapping of Cognitive Abilities Linked to Intelligence.  
608 *Neuron* **61**:681-691. doi: [10.1016/j.neuron.2009.01.026](https://doi.org/10.1016/j.neuron.2009.01.026).
- 609 **Green SA**, Simoes-Costa M, Bronner ME. 2015. Evolution of vertebrates as viewed from the  
610 crest. *Nature* **520**:474-482. doi: [10.1038/nature14436](https://doi.org/10.1038/nature14436).
- 611 **Guilloux JP**, Gaiteri C, Sibille E. 2010. Network analysis of positional candidate genes of  
612 schizophrenia highlights ... more than ... myelin-related pathways. *Molecular Psychiatry*  
613 **15**:786-788. doi: [10.1038/mp.2009.68](https://doi.org/10.1038/mp.2009.68).
- 614 **Gulsuner S and McClellan JM**. 2014. *De Novo* Mutations in Schizophrenia Disrupt Genes  
615 Co-Expressed in Fetal Prefrontal Cortex. *Neuropsychopharmacology* **39**:238-239. doi:  
616 [10.1038/npp.2013.219](https://doi.org/10.1038/npp.2013.219).
- 617 **Haier RJ**, Karama S, Colom R, Jung R, Johnson W. 2014. A comment on "Fractionating  
618 Intelligence" and the peer review process. *Intelligence* **46**:323-332. doi:  
619 [10.1016/j.intell.2014.02.007](https://doi.org/10.1016/j.intell.2014.02.007).
- 620 **Hampshire A**, Highfield RR, Parkin BL, Owen AM. 2012. Fractionating Human Intelligence.  
621 *Neuron* **76**:1225-1237. doi: [10.1016/j.neuron.2012.06.022](https://doi.org/10.1016/j.neuron.2012.06.022).
- 622 **Hawrylycz M**, Miller JA, Menon V, Feng D, Dolbeare T, Guillozet-Bongaarts AL, Jegga  
623 AG, Aronow BJ, Lee C-K, Bernard A, Glasser MF, Dierker DL, Menche J, Szafer A,  
624 Collman F, Grange P, Berman KA, Mihalas S, Yao Z, Stewart L, Barabási A-L, Schulkin  
625 J, Phillips J, Ng L, Dang C, Haynor DR, Jones A, Van Essen DC, Koch C, Lein E. 2015.  
626 Canonical genetic signatures of the adult human brain. *Nature Neuroscience* **18**:1832-  
627 1844. doi: [10.1038/nn.4171](https://doi.org/10.1038/nn.4171).

- 628 **Hemani G**, Shakhbazov K, Westra H-J, Esko T, Henders AK, McRae AF, Yang J, Gibson G,  
629 Martin NG, Metspalu A, Franke L, Montgomery GW, Visscher PM, Powell JE. 2014.  
630 Detection and replication of epistasis influencing transcription in humans. *Nature*  
631 **508**:249–253. doi: [10.1038/nature13005](https://doi.org/10.1038/nature13005).
- 632 **Hyman SE**. 2014. How Far Can Mice Carry Autism Research? *Cell* **158**:13-14. doi:  
633 [10.1016/j.cell.2014.06.032](https://doi.org/10.1016/j.cell.2014.06.032).
- 634 **Iossifov I**, O’Roak BJ, Sanders SJ, Ronemus M, Krumm N, Levy D, Stessman HA,  
635 Witherspoon KT, Vives L, Patterson KE, Smith JD, Paepker B, Nickerson DA, Dea J,  
636 Dong S, Gonzalez LE, Mandell JD, Mane SM, Murtha MT, Sullivan CA, Walker MF,  
637 Waqar Z, Wei L, Willsey AJ, Yamrom B, Lee Y, Grabowska E, Dalkic E, Wang Z, Marks  
638 S, Andrews P, Leotta A, Kendall J, Hakker I, Rosenbaum J, Ma B, Rodgers L, Troge J,  
639 Narzisi G, Seungtai Y, Schatz MC, Kenny Y, McCombie WR, Shendure J, Eichler EE,  
640 State MW, Wigler M. 2014. The contribution of *de novo* coding mutations to autism  
641 spectrum disorder. *Nature* **515**:216–221. doi: [10.1038/nature13908](https://doi.org/10.1038/nature13908).
- 642 **Irimia M**, Weatheritt RJ, Ellis JD, Parikshak NN, Gonatopoulos-Pournatzis T, Babor M,  
643 Quesnel-Vallières M, Tapial J, Raj B, O’Hanlon D, Barrios-Rodiles M, Sternberg MJE,  
644 Cordes SP, Roth FP, Wrana JL, Geschwind DH, Blencowe BJ. 2014. A Highly Conserved  
645 Program of Neuronal Microexons Is Misregulated in Autistic Brains. *Cell* **159**:1511-1523.  
646 doi: [10.1016/j.cell.2014.11.035](https://doi.org/10.1016/j.cell.2014.11.035).
- 647 **Ishigaki S**, Masuda A, Fujioka Y, Iguchi Y, Katsuno M, Shibata A, Urano F, Sobue G, Ohno  
648 K. 2012. Position-dependent FUS-RNA interactions regulate alternative splicing events  
649 and transcriptions. *Scientific Reports* **2**: A529. doi: [10.1038/srep00529](https://doi.org/10.1038/srep00529).
- 650 **Iskow RC**, Gokcumen O, Abyzov A, Malukiewicz J, Zhu Q, Sukumara AT, Pai AA, Mills  
651 RE, Habegger L, Cusanovich DA, Rubel MA, Perry GH, Gerstein M, Stone AC, Gilade Y,  
652 Lee C. 2012. Regulatory element copy number differences shape primate expression

- 653 profiles. *Proceedings of the National Academy of Sciences of the United States of America*.  
654 **109**:12656–12661. doi: [10.1073/pnas.1205199109](https://doi.org/10.1073/pnas.1205199109).
- 655 **Jordan DM**, Frangakis SG, Golzio C, Cassa CA, Kurtzberg J, Task Force for Neonatal  
656 Genomics, Davis EE, Sunyaev SR, Katsanis N. 2015. Identification of *cis*-suppression of  
657 human disease mutations by comparative genomics. *Nature*. **524**:225-229. doi:  
658 [10.1038/nature14497](https://doi.org/10.1038/nature14497).
- 659 **Jung RE and Haier RJ**. 2007. The Parieto-Frontal Integration Theory (P-FIT) of  
660 intelligence: Converging neuroimaging evidence. *Behavioral and Brain Sciences* **30**:135-  
661 187. doi: [10.1017/s0140525x07001185](https://doi.org/10.1017/s0140525x07001185).
- 662 **Kim J**, Ghim J-W, Lee JH, Jung MW. 2013. Neural Correlates of Interval Timing in Rodent  
663 Prefrontal Cortex. *Journal of Neuroscience* **33**:13834-13847. doi: [10.1523/jneurosci.1443-](https://doi.org/10.1523/jneurosci.1443-13.2013)  
664 [13.2013](https://doi.org/10.1523/jneurosci.1443-13.2013).
- 665 **Kim S**, Burette A, Chung HS, Kwon SK, Woo J, Lee HW, Kim K, Kim H, Weinberg RJ,  
666 Kim E. 2006. NGL family PSD-95-interacting adhesion molecules regulate excitatory  
667 synapse formation. *Nature Neuroscience* **9**:1294-1301. doi: [10.1038/nn1763](https://doi.org/10.1038/nn1763).
- 668 **Kimura M**. 1983. The neutral theory of molecular evolution. Cambridge University Press.
- 669 **King IF**, Yandava CN, Mabb AM, Hsiao JS, Huang HS, Pearson BL, Calabrese JM, Starmer  
670 J, Parker JS, Magnuson T, Chamberlain SJ, Philpot BD, Zylka MJ. 2013. Topoisomerases  
671 facilitate transcription of long genes linked to autism. *Nature* **501**:58-62. doi:  
672 [10.1038/nature12504](https://doi.org/10.1038/nature12504).
- 673 **Konopka G**, Bomar JM, Winden K, Coppola G, Jonsson ZO, Gao FY, Peng S, Preuss TM,  
674 Wohlschlegel JA, Geschwind DH. 2009. Human-specific transcriptional regulation of  
675 CNS development genes by FOXP2. *Nature* **462**:213-217. doi: [10.1038/nature08549](https://doi.org/10.1038/nature08549).
- 676 **Konopka G**, Friedrich T, Davis-Turak J, Winden K, Oldham MC, Gao F, Chen L, Wang G-  
677 Z, Luo R, Preuss TM, Geschwind DH. 2012. Human-Specific Transcriptional Networks in

678 the Brain. *Neuron* **23**:601-617. doi: [10.1016/j.neuron.2012.05.034](https://doi.org/10.1016/j.neuron.2012.05.034).

679 **Krause J**, Lalueza-Fox C, Orlando L, Enard W, Green RE, Burbano HA, Hublin J-J, Hänni  
680 C, Fortea J, de la Rasilla M, Bertranpetit J, Rosas A, Pääbo S. 2007. The derived *FOXP2*  
681 variant of modern humans was shared with neandertals. *Current Biology* **17**:1908-1912.  
682 doi: [10.1016/j.cub.2007.10.008](https://doi.org/10.1016/j.cub.2007.10.008).

683 **Lagier-Tourenne C**, Polymenidou M, Hutt KR, Vu AQ, Baughn M, Huelga SC, Clutario  
684 KM, Ling S-C, Liang TY, Mazur C, Wancewicz E, Kim AS, Watt A, Freier S, Hicks GG,  
685 Donohue JP, Shiue L, Bennett CF, Ravits J, Cleveland DW, Yeo GW. 2012. Divergent  
686 roles of ALS-linked proteins FUS/TLS and TDP-43 intersect in processing long pre-  
687 mRNAs. *Nature Neuroscience* **15**:1488-1497. doi: [doi:10.1038/nn.3230](https://doi.org/10.1038/nn.3230).

688 **Lee SH**, Ripke S, Neale BM, Faraone SV, Purcell SM, Perlis RH, Mowry BJ, Thapar A,  
689 Goddard ME, Witte JS, Absher D, Agartz I, Akil H, Amin F, Andreassen OA, Anjorin A,  
690 Anney R, Anttila V, Arking DE, Asherson P, Azevedo MH, Backlund L, Badner JA,  
691 Bailey AJ, Banaschewski T, Barchas JD, Barnes MR, Barrett TB, Bass N, Battaglia A,  
692 Bauer M, Bayés M, Bellivier F, Bergen SE, Berrettini W, Betancur C, Bettecken T,  
693 Biederman J, Binder EB, Black DW, Blackwood DHR, Bloss CS, Boehnke M, Boomsma  
694 DI, Breen G, Breuer R, Bruggeman R, Cormican P, Buccola NG, Buitelaar JK, Bunney  
695 WE, Buxbaum JD, Byerley WF, Byrne EM, Caesar S, Cahn W, Cantor RM, Casas M,  
696 Chakravarti A, Chambert K, Choudhury K, Cichon S, Cloninger CR, Collier DA, Cook E  
697 H, Coon H, Cormand B, Corvin A, Coryell WH, Craig DW, Craig IW, Crosbie J, Cuccaro  
698 ML, Curtis D, Czamara D, Datta S, Dawson G, Day R, De Geus EJ, Degenhardt F,  
699 Djurovic S, Donohoe GJ, Doyle AE, Duan JB, Dudbridge F, Duketis E, Ebstein RP,  
700 Edenberg HJ, Elia J, Ennis S, Etain B, Fanous A, Farmer AE, Ferrier IN, Flickinger M,  
701 Fombonne E, Foroud T, Frank J, Franke B, Fraser C, Freedman R, Freimer NB, Freitag C  
702 M, Friedl M, Frisén L, Gallagher L, Gejman PV, Georgieva L, Gershon ES, Geschwind

703 DH, Giegling I, Gill M, Gordon SD, Gordon-Smith K, Green EK, Greenwood TA, Grice  
704 DE, Gross M, Grozeva D, Guan WH, Gurling H, De Haan L, Haines JL, Hakonarson H,  
705 Hallmayer J, Hamilton SP, Hamshere ML, Hansen TF, Hartmann AM, Hautzinger M,  
706 Heath AC, Henders AK, Herms S, Hickie IB, Hipolito M, Hoefels S, Holmans PA,  
707 Holsboer F, Hoogendijk WJ, Hottenga JJ, Hultman CM, Hus V, Ingason A, Ising M,  
708 Jamain S, Jones EG, Jones I, Jones L, Tzeng JY, Kähler AK, Kahn RS, Kandaswamy R,  
709 Keller MC, Kennedy JL, Kenny E, Kent L, Kim Y, Kirov GK, Klauck SM, Klei L,  
710 Knowles JA, Kohli MA, Koller DL, Konte B, Korszun A, Krabbendam L, Krasucki R,  
711 Kuntsi J, Kwan P, Landen M, Långström N, Lathrop M, Lawrence J, Lawson WB,  
712 Leboyer M, Ledbetter DH, Lee PH, Lencz T, Lesch KP, Levinson DF, Lewis CM, Li J,  
713 Lichtenstein P, Lieberman JA, Lin DY, Linszen DH, Liu CY, Lohoff FW, Loo SK, Lord  
714 C, Lowe JK, Lucae S, MacIntyre DJ, Madden PAF, Maestrini E, Magnusson PKE, Mahon  
715 PB, Maier W, Malhotra AK, Mane SM, Martin CL, Martin NG, Mattheisen M, Matthews  
716 K, Mattingsdal M, McCarroll SA, McGhee KA, McGough JJ, McGrath PJ, McGuffin P,  
717 McInnis MG, McIntosh A, McKinney R, McLean AW, McMahon FJ, McMahon WM,  
718 McQuillin A, Medeiros H, Medland SE, Meier S, Melle I, Meng F, Meyer J, Middeldorp  
719 CM, Middleton L, Milanova V, Miranda A, Monaco AP, Montgomery GW, Moran JL,  
720 Moreno-De-Luca D, Morken G, Morris DW, Morrow EM, Moskvina V, Muglia P,  
721 Mühleisen TW, Muir WJ, Muller-Myhsok B, Murtha M, Myers RM, Myin-Germeys I,  
722 Neale MC, Nelson SF, Nievergelt CM, Nikolov I, Nimgaonkar V, Nolen WA, Nöthen  
723 MM, Nurnberger JI, Nwulia EA, Nyholt DR, O'Dushlaine C, Oades RD, Olincy A,  
724 Oliveira G, Olsen L, Ophoff RA, Osby U, Owen MJ, Palotie A, Parr JR, Paterson AD,  
725 Pato CN, Pato MT, Penninx BW, Pergadia ML, Pericak-Vance MA, Pickard BS, Pimm J,  
726 Piven J, Posthuma D, Potash JB, Poustka F, Propping P, Puri V, Quedstedt DJ, Quinn EM,  
727 Ramos-Quiroga JA, Rasmussen HB, Raychaudhuri S, Rehnström K, Reif A, Ribasés M,

728 Rice JP, Rietschel M, Roeder K, Roeyers H, Rossin L, Rothenberger A, Rouleau G,  
729 Ruderfer D, Rujescu D, Sanders AR, Sanders SJ, Santangelo SL, Sergeant JA, Schachar R,  
730 Schalling M, Schatzberg AF, Scheftner WA, Schellenberg GD, Scherer SW, Schork NJ,  
731 Schulze TG, Schumacher J, Schwarz M, Scolnick E, Scott LJ, Shi JX, Shilling PD, Shyn  
732 SI, Silverman JM, Slager SL, Smalley SL, Smit JH, Smith EN, Sonuga-Barke EJS, St  
733 Clair D, State M, Steffens M, Steinhausen HC, Strauss JS, Strohmaier J, Stroup TS,  
734 Sutcliffe JS, Szatmari P, Szelinger S, Thirumalai S, Thompson RC, Todorov AA, Tozzi F,  
735 Treutlein J, Uhr M, van den Oord EJCG, Van Grootheest G, Van Os J, Vicente AM,  
736 Vieland VJ, Vincent JB, Visscher PM, Walsh CA, Wassink TH, Watson SJ, Weissman  
737 MM, Werge T, Wienker TF, Wijsman EM, Willemsen G, Williams N, Willsey AJ, Witt  
738 SH, Xu W, Young AH, Yu TW, Zammit S, Zandi PP, Zhang P, Zitman FG, Zöllner S,  
739 International Inflammatory Bowel Disease Genetics Consortium (IIBDGC), Devlin B,  
740 Kelsoe JR, Sklar P, Daly MJ, O'Donovan MC, Craddock N, Sullivan PF, Smoller JW,  
741 Kendler KS, Wray NR. 2013. Genetic relationship between five psychiatric disorders  
742 estimated from genome-wide SNPs. *Nature Genetics* **45**:984-994. doi: [10.1038/ng.2711](https://doi.org/10.1038/ng.2711).  
743 **Lesnick TG**, Papapetropoulos S, Mash DC, Ffrench-Mullen J, Shehadeh L, de Andrade M,  
744 Henley JR, Rocca WA, Ahlskog JE, Maraganore DM. 2007. A genomic pathway  
745 approach to a complex disease: Axon guidance and Parkinson disease. *PLoS Genetics*  
746 **3**:984-995. doi: [10.1371/journal.pgen.0030098](https://doi.org/10.1371/journal.pgen.0030098).  
747 **Lips ES**, Cornelisse LN, Toonen RF, Min JL, Hultman CM, the International Schizophrenia  
748 Consortium, Holmans PA, O'Donovan MC, Purcell SM, Smit AB, Verhage M, Sullivan  
749 PF, Visscher PM, Posthuma D. 2012. Functional gene group analysis identifies synaptic  
750 gene groups as risk factor for schizophrenia. *Molecular Psychiatry* **17**:996-1006. doi:  
751 [10.1038/mp.2012.37](https://doi.org/10.1038/mp.2012.37).  
752 **Liu XL**, Somel M, Tang L, Yan Z, Jiang X, Guo S, Yuan Y, He L, Oleksiak A, Zhang Y, Li



- 753 N, Hu YH, Chen W, Qiu ZL, Pääbo S, Khaitovich P. 2012. Extension of cortical synaptic  
754 development distinguishes humans from chimpanzees and macaques. *Genome Research*  
755 **22**:611-622. doi: [10.1101/gr.127324.111](https://doi.org/10.1101/gr.127324.111).
- 756 **Maier R**, Moser G, Chen G-B, Ripke S, Cross-disorder Working Group of the Psychiatric  
757 Genomics Consortium, Coryell W, Potash JB, Scheftner WA, Shi J, Weissman MM,  
758 Hultman CM, Landén M, Levinson DF, Kendler KS, Smoller JW, Wray NR, Lee SH.  
759 2015. Joint Analysis of Psychiatric Disorders Increases Accuracy of Risk Prediction for  
760 Schizophrenia, Bipolar Disorder, and Major Depressive Disorder. *The American Journal*  
761 *of Human Genetics* **96**:283-294. doi: [10.1016/j.ajhg.2014.12.006](https://doi.org/10.1016/j.ajhg.2014.12.006).
- 762 **Markowitz DA**, Curtis CE, Pesaran B. 2015. Multiple component networks support working  
763 memory in prefrontal cortex. *Proceedings of the National Academy of Sciences of the*  
764 *United States of America* **112**:11084-11089. doi: [10.1073/pnas.1504172112](https://doi.org/10.1073/pnas.1504172112).
- 765 **Maurano MT**, Humbert R, Rynes E, Thurman RE, Haugen E, Wang H, Reynolds AP,  
766 Sandstrom R, Qu HZ, Brody J, Shafer A, Neri F, Lee K, Kutuyavin T, Stehling-Sun S,  
767 Johnson AK, Canfield TK, Giste E, Diegel M, Bates D, Hansen RS, Neph S, Sabo PJ,  
768 Heimfeld S, Raubitschek A, Ziegler S, Cotsapas C, Sotoodehnia N, Glass I, Sunyaev SR,  
769 Kaul R, Stamatoyannopoulos JA. 2012. Systematic Localization of Common Disease-  
770 Associated Variation in Regulatory DNA. *Science* **337**:1190-1195. doi:  
771 [10.1126/science.1222794](https://doi.org/10.1126/science.1222794).
- 772 **McLean CY**, Reno PL, Pollen AA, Bassan AI, Capellini TD, Guenther C, Indjeian VB, Lim  
773 XH, Menke DB, Schaar BT, Wenger AM, Bejerano G, Kingsley DM. 2011. Human-  
774 specific loss of regulatory DNA and the evolution of human-specific traits. *Nature*  
775 **471**:216-219. doi: [10.1038/nature09774](https://doi.org/10.1038/nature09774).
- 776 **McWilliam H**, Li W, Uludag M, Squizzato S, Park YM, Buso N, Cowley AP, Lopez R. 2013.  
777 Analysis Tool Web Services from the EMBL-EBI. *Nucleic Acids Research* **41**:597-600.



778 [doi: 10.1093/nar/gkt376](https://doi.org/10.1093/nar/gkt376).

779 **Meerabux JMA**, Ohba H, Fukasawa M, Suto Y, Aoki-Suzuki M, Nakashiba T, Nishimura S,  
780 Itohara S, Yoshikawa T. 2005. Human netrin-G1 isoforms show evidence of differential  
781 expression. *Genomics* **86**:112–116. [doi: 10.1016/j.ygeno.2005.04.004](https://doi.org/10.1016/j.ygeno.2005.04.004).

782 **Miller JA**, Horvath S, Geschwind DH. 2010. Divergence of human and mouse brain  
783 transcriptome highlights Alzheimer disease pathways. *Proceedings of the National*  
784 *Academy of Sciences of the United States of America* **107**:12698-12703. [doi:](https://doi.org/10.1073/pnas.0914257107)  
785 [10.1073/pnas.0914257107](https://doi.org/10.1073/pnas.0914257107).

786 **Nakashiba T**, Ikeda T, Nishimura S, Tashiro K, Honjo T, Culotti JG, Itohara, S. 2000.  
787 Netrin-G1: a Novel Glycosyl Phosphatidylinositol-Linked Mammalian Netrin That Is  
788 Functionally Divergent from Classical Netrins. *The Journal of Neuroscience* **20**:6540-  
789 6550.

790 **Nakashiba T**, Nishimura S, Ikeda T, Itohara S. 2002. Complementary expression and neurite  
791 outgrowth activity of netrin-G subfamily members. *Mechanisms of Development* **111**:47-  
792 60. [doi: 10.1016/S0925-4773\(01\)00600-1](https://doi.org/10.1016/S0925-4773(01)00600-1).

793 **Nakaya T**, Alexiou P, Maragkakis M, Chang A, Mourelatos Z. 2013. FUS regulates genes  
794 coding for RNA-binding proteins in neurons by binding to their highly conserved introns.  
795 *RNA* **19**:498-509. [doi: 10.1261/rna.037804.112](https://doi.org/10.1261/rna.037804.112).

796 **Nectoux J**, Girard B, Bahi-Buisson N, Prieur F, Afenjar A, Rosas-Vargas H, Chelly J,  
797 Bienvenu T. 2007. *Netrin G1* mutations are an uncommon cause of atypical Rett  
798 syndrome with or without epilepsy. *Pediatric Neurology* **37**:270-274. [doi:](https://doi.org/10.1016/j.pediatrneurol.2007.06.002)  
799 [10.1016/j.pediatrneurol.2007.06.002](https://doi.org/10.1016/j.pediatrneurol.2007.06.002).

800 **Parikshak NN**, Gandal MJ, Geschwind DH. 2015. Systems biology and gene networks in  
801 neurodevelopmental and neurodegenerative disorders. *Nature Reviews Genetics* **16**:441-  
802 458. [doi: 10.1038/nrg3934](https://doi.org/10.1038/nrg3934).

- 803 **Nishimura-Akiyoshi S**, Niimi K, Nakashiba T, and Itohara S. 2007. Axonal netrin-Gs  
804 transneuronally determine lamina-specific subdendritic segments. *Proceedings of the*  
805 *National Academy of Sciences of the United States of America* **104**:14801-14806. doi:  
806 [10.1073/pnas.0706919104](https://doi.org/10.1073/pnas.0706919104).
- 807 **O’Roak BJ**, Vives L, Girirajan S, Karakoc E, Krumm N, Coe BP, Levy R, Ko A, Lee C,  
808 Smith JD, Turner EH, Stanaway IB, Vernot B, Malig M, Baker C, Reilly B, Akey JM,  
809 Borenstein E, Rieder MJ, Nickerson DA, Bernier R, Shendure J, Eichler EE. 2012a.  
810 Sporadic autism exomes reveal a highly interconnected protein network of *de novo*  
811 mutations. *Nature* **485**:246-250. doi: [10.1038/nature10989](https://doi.org/10.1038/nature10989).
- 812 **O’Roak BJ**, Vives L, Fu WQ, Egertson JD, Stanaway IB, Phelps IG, Carvill G, Kumar A,  
813 Lee C, Ankenman K, Munson J, Hiatt JB, Turner EH, Levy R, O’Day DR, Krumm N, Coe  
814 BP, Martin BK, Borenstein E, Nickerson DA, Mefford HC, Doherty D, Akey JM, Bernier  
815 R, Eichler EE, Shendure J. 2012b. Multiplex Targeted Sequencing Identifies Recurrently  
816 Mutated Genes in Autism Spectrum Disorders. *Science* **338**:1619-1622. doi:  
817 [10.1126/science.1227764](https://doi.org/10.1126/science.1227764).
- 818 **Ohno S**. 1970. Evolution by Gene Duplication. Springer, New York.
- 819 **Ohtsuki T**, Horiuchi Y, Koga M, Ishiguro H, Inada T, Iwata N, Ozaki N, Ujike H, Watanabe  
820 Y, Someya T, Arinami T. 2008. Association of polymorphisms in the haplotype block  
821 spanning the alternatively spliced exons of the *NTNG1* gene at 1p13.3 with schizophrenia  
822 in Japanese populations. *Neuroscience Letters* **435**:194-197. doi:  
823 [10.1016/j.neulet.2008.02.053](https://doi.org/10.1016/j.neulet.2008.02.053).
- 824 **Pamplona GSP**, Neto GSS, Rosset SRE, Rogers BP, Salmon CEG. 2015. Analyzing the  
825 association between functional connectivity of the brain and intellectual performance.  
826 *Frontiers in Human Neuroscience* **9**:A61. doi: [10.3389/fnhum.2015.00061](https://doi.org/10.3389/fnhum.2015.00061).
- 827 **Pan Y**, Fang M, Shen L, Wang L, Lv Y, Xi Z, Chen D, Li C, Wang X. 2010. Abnormal

- 828 expression of netrin-G2 in temporal lobe epilepsy neurons in humans and a rat model.  
829 *Experimental Neurology* **224**:340-346. doi: [10.1016/j.expneurol.2010.04.001](https://doi.org/10.1016/j.expneurol.2010.04.001).
- 830 **Petersen TN**, Brunak S, von Heijne G, Nielsen H. 2011. SignalP 4.0: discriminating signal  
831 peptides from transmembrane regions. *Nature Methods* **8**:785-786. doi:  
832 [10.1038/nmeth.1701](https://doi.org/10.1038/nmeth.1701).
- 833 **Pollard KS**, Salama SR, King B, Kern AD, Dreszer T, Katzman S, Siepel A, Pedersen JS,  
834 Bejerano G, Baertsch R, Rosenbloom KR, Kent J, Haussler D. 2006. Forces shaping the  
835 fastest evolving regions in the human genome. *PLoS Genetics* **2**:1599-1611. doi:  
836 [10.1371/journal.pgen.0020168](https://doi.org/10.1371/journal.pgen.0020168).
- 837 **Power RA**, Steinberg S, Bjornsdottir G, Rietveld CA, Abdellaoui A, Nivard MM,  
838 Johannesson M, Galesloot TE, Hottenga JJ, Willemsen G, Cesarini D, Benjamin DJ,  
839 Magnusson PKE, Ullén F, Tiemeier H, Hofman A, van Rooij FJA, Walters GB,  
840 Sigurdsson E, Thorgeirsson TE, Ingason A, Helgason A, Kong A, Kiemenev LA,  
841 Koellinger P, Boomsma DI, Gudbjartsson D, Stefansson H, Stefansson K. 2015. Polygenic  
842 risk scores for schizophrenia and bipolar disorder predict creativity. *Nature Neuroscience*  
843 **18**:953-955. doi: [10.1038/nn.4040](https://doi.org/10.1038/nn.4040).
- 844 **Preuss TM**. 2012. Human brain evolution: From gene discovery to phenotype discovery.  
845 *Proceedings of the National Academy of Sciences of the United States of America*  
846 **109**:10709-10716. doi : [10.1073/pnas.1201894109](https://doi.org/10.1073/pnas.1201894109).
- 847 **Rada-Iglesias A**, Bajpai R, Prescott S, Brugmann SA, Swigut T, Wysocka J. 2012.  
848 Epigenomic Annotation of Enhancers Predicts Transcriptional Regulators of Human  
849 Neural Crest. *Cell Stem Cell* **11**:1-16. doi: [10.1016/j.stem.2012.07.006](https://doi.org/10.1016/j.stem.2012.07.006).
- 850 **Reddy LF**, Lee J, Davis MC, Altshuler L, Glahn DC, Miklowitz DJ, Green MF. 2014.  
851 Impulsivity and Risk Taking in Bipolar Disorder and Schizophrenia.  
852 *Neuropsychopharmacology* **39**:456-463. doi: [10.1038/npp.2013.218](https://doi.org/10.1038/npp.2013.218).

- 853 **Richiardi J**, Altmann A, Milazzo A-C, Chang C, Chakravarty MM, Banaschewski T, Barker  
854 GJ, Bokde ALW, Bromberg U, Büchel C, Conrod P, Fauth-Bühler M, Flor H, Frouin V,  
855 Gallinat J, Garavan H, Gowland P, Heinz A, Lemaître H, Mann KF, Martinot J-L, Nees F,  
856 Paus T, Pausova Z, Rietschel M, Robbins TW, Smolka MN, Spanagel R, Ströhle A,  
857 Schumann G, Hawrylycz M, Poline J-B, Greicius MD, IMAGEN consortium. 2015.  
858 Correlated gene expression supports synchronous activity in brain networks. *Science*  
859 **348**:1241-1244. doi: [10.1126/science.1255905](https://doi.org/10.1126/science.1255905).
- 860 **Riga D**, Matos MR, Glas A, Smit AB, Spijker S, Van den Oever MC. 2014. Optogenetic  
861 dissection of medial prefrontal cortex circuitry. *Frontiers in Systems Neuroscience* **8**:A230.  
862 doi: [10.3389/fnsys.2014.00230](https://doi.org/10.3389/fnsys.2014.00230).
- 863 **Rogelj B**, Easton LE, Bogu GK, Stanton LW, Rot G, Curk T, Zupan B, Sugimoto Y, Modic  
864 M, Haberman N, Tollervey J, Fujii R, Takumi T, Shaw CE, Ule J. 2012. Widespread  
865 binding of FUS along nascent RNA regulates alternative splicing in the brain. *Scientific*  
866 *Reports* **2**:A603. doi: [10.1038/srep00603](https://doi.org/10.1038/srep00603).
- 867 **Romero E**, Ali C, Molina-Holgado E, Castellano B, Guaza C, Borrell J. 2007.  
868 Neurobehavioral and immunological consequences of prenatal immune activation in rats.  
869 Influence of antipsychotics. *Neuropsychopharmacology* **32**:1791-1804. doi:  
870 [10.1038/sj.npp.1301292](https://doi.org/10.1038/sj.npp.1301292).
- 871 **Scharf JM**, Yu D, Mathews CA, Neale BM, Stewart SE, Fagerness JA, Evans P, Gamazon E,  
872 Edlund CK, Service SK, Tikhomirov A, Osiecki L, Illmann C, Pluzhnikov A,  
873 Konkashbaev A, Davis LK, Han B, Crane J, Moorjani P, Crenshaw AT, Parkin MA, Reus  
874 VI, Lowe TL, Rangel-Lugo M, Chouinard S, Dion Y, Girard S, Cath DC, Smit JH, King  
875 RA, Fernandez TV, Leckman JF, Kidd KK, Kidd JR, Pakstis AJ, State MW, Herrera LD,  
876 Romero R, Fournier E, Sandor P, Barr CL, Phan N, Gross-Tsur V, Benarroch F, Pollak Y,  
877 Budman CL, Bruun RD, Erenberg G, Naarden AL, Lee PC, Weiss N, Kremeyer B, Berrío

878 GB, Campbell DD, Silgado JCC, Ochoa WC, Restrepo SCM, Muller H, Duarte AVV,  
879 Lyon GJ, Leppert M, Morgan J, Weiss R, Grados MA, Anderson K, Davarya S, Singer H,  
880 Walkup J, Jankovic J, Tischfield JA, Heiman GA, Gilbert DL, Hoekstra PJ, Robertson  
881 MM, Kurlan R, Liu C, Gibbs JR, Singleton A for the North American Brain Expression  
882 Consortium, Hardy J for the UK Human Brain Expression Database, Strengman E, Ophoff  
883 RA, Wagner M, Moessner R, Mirel DB, Posthuma D, Sabatti C, Eskin E, Conti DV,  
884 Knowles JA, Ruiz-Linares A, Rouleau GA, Purcell S, Heutink P, Oostra BA, McMahon  
885 WM, Freimer NB, Cox NJ, Pauls DL. 2013. Genome-wide association study of Tourette's  
886 syndrome. *Molecular Psychiatry* **18**:721-728. doi: [10.1038/mp.2012.69](https://doi.org/10.1038/mp.2012.69).

887 **Seiradake E**, Coles CH, Perstenko PV, Harlos K, McIlhinney RAJ, Aricescu AR, Jones EY.  
888 2011. Structural basis for cell surface patterning through NetrinG–NGL interactions. The  
889 *EMBO Journal* **30**:4479-4488. doi: [10.1038/emboj.2011.346](https://doi.org/10.1038/emboj.2011.346).

890 **Sanders SJ**, He X, Willsey AJ, Ercan-Sencicek AG, Samocha KE, Cicek AE, Murtha MT,  
891 Bal VH, Bishop SL, Dong S, Goldberg AP, Jinlu C, Keaney III JF, Klei L, Mandell JD,  
892 Moreno-De-Luca D, Poultney CS, Robinson EB, Smith L, Solli-Nowlan T, Su MY, Teran  
893 NA, Walker MF, Werling DM, Beaudet AL, Cantor RM, Fombonne E, Geschwind DH,  
894 Grice DE, Lord C, Lowe JK, Mane SM, Martin DM, Morrow EM, Talkowski ME,  
895 Sutcliffe JS, Walsh CA, Yu TW, Autism Sequencing Consortium, Ledbetter DH, Martin  
896 CL, Cook EH, Buxbaum JD, Daly MJ, Devlin B, Roeder K, State MW. 2015. Insights into  
897 Autism Spectrum Disorder Genomic Architecture and Biology from 71 Risk Loci. *Cell*  
898 **87**:1215–1233. doi: [10.1016/j.neuron.2015.09.016](https://doi.org/10.1016/j.neuron.2015.09.016).

899 **Shucard JL**, Lee WH, Safford AS, Shucard DW. 2011. The Relationship Between  
900 Processing Speed and Working Memory Demand in Systemic Lupus Erythematosus:  
901 Evidence From a Visual N-Back Task. *Neuropsychology* **25**:45-52. doi:  
902 [10.1037/a0021218](https://doi.org/10.1037/a0021218).

- 903 **Song M**, Zhou Y, Li J, Liu Y, Tian L, Yu C, Tianzi, J. 2008. Brain spontaneous functional  
904 connectivity and intelligence. *Neuroimage* **41**:1168-1176. doi:  
905 [10.1016/j.neuroimage.2008.02.036](https://doi.org/10.1016/j.neuroimage.2008.02.036).
- 906 **Skeide MA and Friederici AD**. 2015. Response to Bornkessel-Schlesewsky *et al.* - towards  
907 a nonhuman primate model of language? *Trends in Cognitive Sciences*. **9**:483. doi:  
908 [10.1016/j.tics.2015.05.011](https://doi.org/10.1016/j.tics.2015.05.011).
- 909 **Song YS**, Lee H-J, Prosselkov P, Itohara S, Kim E. 2013. Trans-induced cis interaction in the  
910 tripartite NGL-1, netrin-G1 and LAR adhesion complex promotes development of  
911 excitatory synapses. *Journal of Cell Science* **126**:4926-4938. doi: [10.1242/jcs.129718](https://doi.org/10.1242/jcs.129718).
- 912 **Soto F**, Watkins KL, Johnson RE, Schottler F, Kerschensteiner D. 2013. NGL-2 Regulates  
913 Pathway-Specific Neurite Growth and Lamination, Synapse Formation, and Signal  
914 Transmission in the Retina. *Journal of Neuroscience* **33**:11949-11959. doi:  
915 [10.1523/jneurosci.1521-13.2013](https://doi.org/10.1523/jneurosci.1521-13.2013).
- 916 **Spellman T**, Rigotti M, Ahmari SE, Fusi S, Gogos JA, Gordon JA. 2015. Hippocampal–  
917 prefrontal input supports spatial encoding in working memory. *Nature* **522**:309-314. doi:  
918 [10.1038/nature14445](https://doi.org/10.1038/nature14445).
- 919 **Steentoft C**, Vakhrushev SY, Joshi HJ, Kong Y, Vester-Christensen MB, Schjoldager KTBG,  
920 Lavrsen K, Dabelsteen S, Pedersen NB, Marcos-Silva L, Gupta R, Bennett EP, Mandel U,  
921 Brunak S, Wandall HH, Lavery SB, Clausen H. 2013. Precision mapping of the human O-  
922 GalNAc glycoproteome through SimpleCell technology. *Embo Journal* **32**:1478-1488.  
923 doi: [10.1038/emboj.2013.79](https://doi.org/10.1038/emboj.2013.79).
- 924 **Stepanyan A**, Zakharyan R, Boyajyan A. 2013. The netrin G1 gene rs628117 polymorphism  
925 is associated with ischemic stroke. *Neuroscience Letters* **549**:74-77. doi:  
926 [10.1016/j.neulet.2013.05.066](https://doi.org/10.1016/j.neulet.2013.05.066).
- 927 **Stewart SE**, Yu D, Scharf JM, Neale BM, Fagerness JA, Mathews CA, Arnold PD, Evans

928 PD, Gamazon ER, Osiecki L, McGrath L, Haddad S, Crane J, Hezel D, Illman C,  
929 Mayerfeld C, Konkashbaev A, Liu C, Pluzhnikov A, Tikhomirov A, Edlund CK, Rauch  
930 SL, Moessner R, Falkai P, Maier W, Ruhrmann S, Grabe HJ, Lennertz L, Wagner M,  
931 Bellodi L, Cavallini MC, Richter MA, Cook EH, Kennedy JL, Rosenberg D, Stein DJ,  
932 Hemmings SMJ, Lochner C, Azzam A, Chavira DA, Fournier E, Garrido H, Sheppard B,  
933 Umana P, Murphy DL, Wendland JR, Veenstra-VanderWeele J, Denys D, Blom R,  
934 Deforce D, Van Nieuwerburgh F, Westenberg HGM, Walitza S, Egberts K, Renner T,  
935 Miguel EC, Cappi C, Hounie AG, do Rosário MC, Sampaio AS, Vallada H, Nicolini H,  
936 Lanzagorta N, Camarena B, Delorme R, Leboyer M, Pato CN, Pato MT, Voyiaziakis E,  
937 Heutink P, Cath DC, Posthuma D, Smit JH, Samuels J, Bienvenu OJ, Cullen B, Fyer AJ,  
938 Grados MA, Greenberg BD, McCracken JT, Riddle MA, Wang Y, Coric V, Leckman JF,  
939 Bloch M, Pittenger C, Eapen V, Black DW, Ophoff RA, Strengman E, Cusi D, Turiel M,  
940 Frau F, Macciardi F, Gibbs JR, Cookson MR, Singleton A for the North American Brain  
941 Expression Consortium, Hardy J for the UK Human Brain Expression Database, Crenshaw  
942 AT, Parkin MA, Mirel DB, Conti DV, Purcell S, Nestadt G, Hanna GL, Jenike MA,  
943 Knowles JA, Cox N, Pauls DL. 2013. Genome-wide association study of obsessive-  
944 compulsive disorder. *Molecular Psychiatry* **18**:788-798. doi: [10.1038/mp.2012.85](https://doi.org/10.1038/mp.2012.85).  
945 **Stolfi A**, Ryan K, Meinertzhagen IA, Christiaen L. 2015. Migratory neuronal progenitors  
946 arise from the neural plate borders in tunicates. *Nature* **527**:371-374. doi:  
947 [10.1038/nature15758](https://doi.org/10.1038/nature15758).  
948 **The Japanese Schizophrenia Sib-Pair Linkage Group (JSSLG)**, Arinami T, Ohtsuki T,  
949 Ishiguro H, Ujike H, Tanaka Y, Morita Y, Mineta M, Takeichi M, Yamada S, Imamura A,  
950 Ohara K, Shibuya H, Ohara, K, Suzuki Y, Muratake T, Kaneko N, Someya T, Inada T,  
951 Yoshikawa T, Toyota T, Yamada K, Kojima T, Takahashi S, Osamu O, Shinkai T,  
952 Nakamura M, Fukuzako H, Hashiguchi T, Niwa S, Ueno T, Tachikawa H, Hori T, Asada T,



- 953 Nanko S, Kunugi H, Hashimoto R, Ozaki N, Iwata N, Harano M, Arai H, Ohnuma T,  
954 Kusumi I, Koyama T, Yoneda H, Fukumaki Y, Shibata H, Kaneko S, Higuchi H, Yasui-  
955 Furukori N, Numachi Y, Itokawa M, Okazaki Y. 2005. Genomewide high-density SNP  
956 linkage analysis of 236 Japanese families supports the existence of schizophrenia  
957 susceptibility loci on chromosomes 1p, 14q, and 20p. *American Journal of Human*  
958 *Genetics* **77**:937-944. doi: [10.1086/498122](https://doi.org/10.1086/498122).
- 959 **The PsychENCODE Consortium**, Akbarian S, Liu C, Knowles JA, Vaccarino FM, Farnham  
960 PJ, Crawford GE, Jaffe AE, Pinto D, Dracheva S, Geschwind DH, Mill J, Nairn AC,  
961 Abyzov A, Pochareddy S, Prabhakar S, Weissman S, Sullivan PF, State MW, Weng Z,  
962 Peters MA, White KP, Gerstein MB, Senthil G, Lehner T, Sklar P, Sestan N. 2015. The  
963 PsychENCODE project. *Nature Neuroscience* **18**:1707-1712. doi: [10.1038/nn.4156](https://doi.org/10.1038/nn.4156).
- 964 **Ule J**, Ule A, Spencer J, Williams A, Hu JS, Cline M, Wang H, Clark T, Fraser C, Ruggiu M,  
965 Zeeberg BR, Kane D, Weinstein JN, Blume J, Darnell RB. 2005. Nova regulates brain-  
966 specific splicing to shape the synapse. *Nature Genetics* **37**:844-852. doi: [10.1038/ng1610](https://doi.org/10.1038/ng1610).
- 967 **van Kuilenburg ABP**, Meijer J, Mul ANPM, Hennekam RCM, Hoovers JMN, de Die-  
968 Smulders CEM, Weber P, Mori AC, Bierau J., Fowler B, Macke K, Sass JO, Meinsma R,  
969 Hennermann JB, Miny P, Zoetekouw L, Vijzelaar R, Nicolai J, Ylstra, B, Rubio-Gozalbo  
970 ME. 2009. Analysis of severely affected patients with dihydropyrimidine dehydrogenase  
971 deficiency reveals large intragenic rearrangements of *DPYD* and a de novo interstitial  
972 deletion del(1)(p13.3p21.3). *Human Genetics* **125**:581-590. doi: [10.1007/s00439-009-](https://doi.org/10.1007/s00439-009-0653-6)  
973 [0653-6](https://doi.org/10.1007/s00439-009-0653-6).
- 974 **Voineagu I**, Wang X, Johnston P, Lowe JK, Tian Y, Horvath S, Mill J, Cantor RM,  
975 Blencowe BJ, Geschwind DH. 2011. Transcriptomic analysis of autistic brain reveals  
976 convergent molecular pathology. *Nature* **474**: 380-384. doi: [10.1038/nature10110](https://doi.org/10.1038/nature10110).
- 977 **Wang K**, Zhang H, Bloss CS, Duvvuri V, Kaye W, Schork NJ, Berrettini W, Hakonarson H,



- 978 the Price Foundation Collaborative Group. 2011. A genome-wide association study on  
979 common SNPs and rare CNVs in anorexia nervosa. *Molecular Psychiatry* **16**:949-959.  
980 [doi: 10.1038/mp.2010.107](https://doi.org/10.1038/mp.2010.107).
- 981 **Wilcox JA and Quadri S.** 2014. Replication of NTNG1 association in schizophrenia.  
982 *Psychiatric Genetics* **24**:266-268. [doi: 10.1097/ypg.0000000000000061](https://doi.org/10.1097/ypg.0000000000000061).
- 983 **Wise SP.** 2008. Forward frontal fields: phylogeny and fundamental function. *Trends in*  
984 *Neurosciences* **31**:599-608. [doi: 10.1016/j.tins.2008.08.008](https://doi.org/10.1016/j.tins.2008.08.008).
- 985 **Wu JQ, Wang X, Beveridge NJ, Tooney PA, Scott RJ, Carr VJ, Cairns MJ.** 2012.  
986 Transcriptome Sequencing Revealed Significant Alteration of Cortical Promoter Usage  
987 and Splicing in Schizophrenia. *PLoS One* **7**:e36351. [doi: 10.1371/journal.pone.0036351](https://doi.org/10.1371/journal.pone.0036351).
- 988 **Xu K, Schadt EE, Pollard KS, Roussos P, Dudley JT.** 2015. Genomic and network patterns  
989 of schizophrenia genetic variation in human evolutionary accelerated regions. *Molecular*  
990 *Biology and Evolution* **32**:1148–1160. [doi: 10.1093/molbev/msv031](https://doi.org/10.1093/molbev/msv031).
- 991 **Yaguchi K, Nishimura-Akiyoshi S, Kuroki S, Onodera T, Itohara S.** 2014. Identification of  
992 transcriptional regulatory elements for *Ntng1* and *Ntng2* genes in mice. *Molecular Brain*  
993 **7**:19. [doi: 10.1186/1756-6606-7-19](https://doi.org/10.1186/1756-6606-7-19).
- 994 **Yin Y, Miner JH, Sanes JR.** 2002. Laminets: Laminin- and netrin-related genes expressed in  
995 distinct neuronal subsets. *Molecular and Cellular Neuroscience* **19**:344-358. [doi:](https://doi.org/10.1006/mcne.2001.1089)  
996 [10.1006/mcne.2001.1089](https://doi.org/10.1006/mcne.2001.1089).
- 997 **Yoon JH, Sheremata SL, Rokem A, Silver MA.** 2014. Windows to the soul: vision science as  
998 a tool for studying biological mechanisms of information processing deficits in  
999 schizophrenia. *Frontiers in Psychology* **4**:A681. [doi: 10.3389/fpsyg.2014.00681](https://doi.org/10.3389/fpsyg.2014.00681).
- 1000 **Zakharyan R, Boyajyan A, Arakelyan A, Gevorgyan A, Mrazek F, Petrek M.** 2011.  
1001 Functional variants of the genes involved in neurodevelopment and susceptibility to  
1002 schizophrenia in an Armenian population. *Human Immunology* **72**:746-748. [doi:](https://doi.org/10.1016/j.humimm.2011.05.008)

- 1003 [10.1016/j.humimm.2011.05.018](https://doi.org/10.1016/j.humimm.2011.05.018).
- 1004 **Zhang B**, Gaiteri C, Bodea LG, Wang Z, McElwee J, Podtelezhnikov AA, Zhang CS, Xie T,  
1005 Tran L, Dobrin R, Fluder E, Clurman B, Melquist S, Narayanan M, Suver C, Shah H,  
1006 Mahajan M, Gillis T, Mysore J, MacDonald ME, Lamb JR, Bennett DA, Molony C, Stone  
1007 DJ, Gudnason V, Myers AJ, Schadt EE, Neumann H, Zhu J, Emilsson V. 2013. Integrated  
1008 Systems Approach Identifies Genetic Nodes and Networks in Late-Onset Alzheimer's  
1009 Disease. *Cell* **153**:707-720. doi: [10.1016/j.cell.2013.03.030](https://doi.org/10.1016/j.cell.2013.03.030).
- 1010 **Zhao M**, Kong L, Qu H. 2014. A systems biology approach to identify intelligence quotient  
1011 score-related genomic regions, and pathways relevant to potential therapeutic treatments.  
1012 *Scientific Reports* **4**:A4176. doi: [10.1038/srep04176](https://doi.org/10.1038/srep04176).
- 1013 **Zhou H**, Hu S, Matveev R, Yu Q, Li J, Khaitovich P, Jin L, Lachmann M, Stoneking M, Fu  
1014 Q, Tang K. 2015. A Chronological Atlas of Natural Selection in the Human Genome  
1015 during the Past Half-million Years. *BioRxiv*. doi: [10.1101/018929](https://doi.org/10.1101/018929).
- 1016 **Zhu Y**, Yang H, Bi Y, Zhang Y, Zhen C, Xie S, Qin H, He J, Liu L, Liu Y. 2011. Positive  
1017 association between *NTNG1* and schizophrenia in Chinese Han population. *Journal of*  
1018 *Genetics* **90**:499-502.

| A-1 <i>NTNG1</i> reported associations                                                                                                                                                                         | Cognitive disorder (CD)                                                     | A-2 <i>NTNG2</i> reported associations                |
|----------------------------------------------------------------------------------------------------------------------------------------------------------------------------------------------------------------|-----------------------------------------------------------------------------|-------------------------------------------------------|
| Voineagu et al., 2011; O'Roak et al., 2012a,b; King et al., 2013*; Iossifov et al., 2014; Sanders et al., 2015; D'Gamma et al., 2015                                                                           | Autism sporadic disorder (ASD)                                              | Sanders et al., 2015; D'Gamma et al., 2015            |
| Eastwood and Harrison, 2008, 2010; Akula et al., 2014                                                                                                                                                          | Bipolar disorder (BD)                                                       | Eastwood and Harrison, 2008, 2010; Akula et al., 2014 |
| Fukasawa et al., 2004; Aoki-Suzuki et al., 2005; JSSLG et al., 2005; Eastwood and Harrison, 2008; Ohtsuki et al., 2008; Zakharyan et al., 2011; Zhu et al., 2011; Ayalew et al., 2012; Wilcox and Quadri, 2014 | Schizophrenia (SCZ)                                                         | Aoki-Suzuki et al., 2005; Eastwood and Harrison, 2008 |
| Zhang et al., 2013                                                                                                                                                                                             | Alzheimer disease (AD)                                                      |                                                       |
| Lagier-Tourenne et al., 2012*; Ishigaki et al., 2012*; Rogelji et al., 2012*; Nakaya et al., 2013*                                                                                                             | Amyotrophic lateral sclerosis (ALS)<br>Fronto-temporal lobe dementia (FTLD) |                                                       |
| Maurano et al., 2012; Wang et al., 2011; Boraska et al., 2014                                                                                                                                                  | Anorexia nervosa (AN)                                                       |                                                       |
| van Kuilenburg et al., 2009                                                                                                                                                                                    | Dihydropyrimidine dehydrogenase deficiency (DPD)                            |                                                       |
| Gilissen et al., 2014                                                                                                                                                                                          | Intellectual disability (ID)                                                |                                                       |
| Stepanyan et al., 2013                                                                                                                                                                                         | Ischemic stroke (IS)                                                        |                                                       |
| Bisgaard et al., 2007                                                                                                                                                                                          | Mental retardation (MeR)                                                    |                                                       |
| Stewart et al., 2013*                                                                                                                                                                                          | Obsessive-compulsive disorder (OCD)                                         |                                                       |
| Lesnick et al., 2007                                                                                                                                                                                           | Parkinson disease (PD)                                                      |                                                       |
|                                                                                                                                                                                                                | Pseudopapillary neoplasm (PN)                                               | Cavard et al., 2009                                   |
| Borg et al., 2005; Archer et al., 2006; Nectoux et al., 2007                                                                                                                                                   | Rett syndrome (RS)                                                          |                                                       |
|                                                                                                                                                                                                                | Systemic lupus erythematosus (SLE)                                          | Maurano et al., 2012                                  |
|                                                                                                                                                                                                                | Temporal lobe epilepsy (TLE)                                                | Pan et al., 2010                                      |
| Scharf et al., 2013*                                                                                                                                                                                           | Tourette syndrome (TS)                                                      |                                                       |

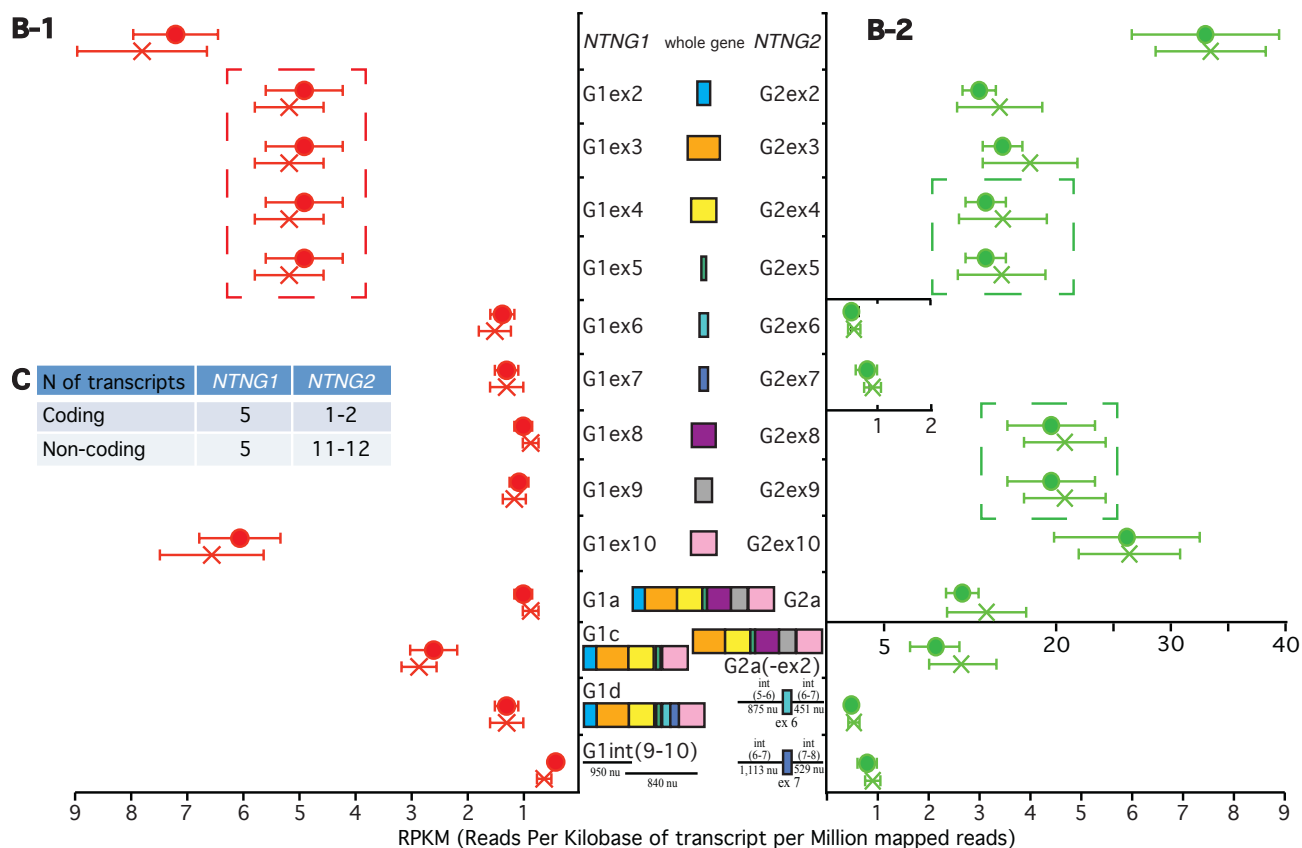

**Figure 1. *NTNG* paralogs complementation within neurological disorders and brain transcriptome. (A-1, A-2)** Reported cognitive disorders associations for *NTNG1* and *NTNG2*. \*denotes rather an indirect association via a direct interaction with the research target. **(B-1, B-2)** RNA-seq of the STG of healthy (circle) and SCZ (cross) human subjects. The original dataset was produced by (Wu et al., 2012), accession number E-MTAB-1030 on ArrayExpress (ST1a) and reprocessed as described in SM. Five *NTNG1* and four *NTNG2* transcripts, consistently expressed across all 16 human samples are shown. Two samples (one healthy and one SCZ) have been omitted due to unsatisfactory quality of reads and expression profiling (ST1b). For the SNPs calling by SAMtools see ST1c. Data are presented as a mean RPKM $\pm$ SEM. **(C)** Total number of the assembled transcripts across all samples for both paralogs (see ST1d for the completely reconstructed transcriptome). Dash-outlined are co-spliced exon clusters.

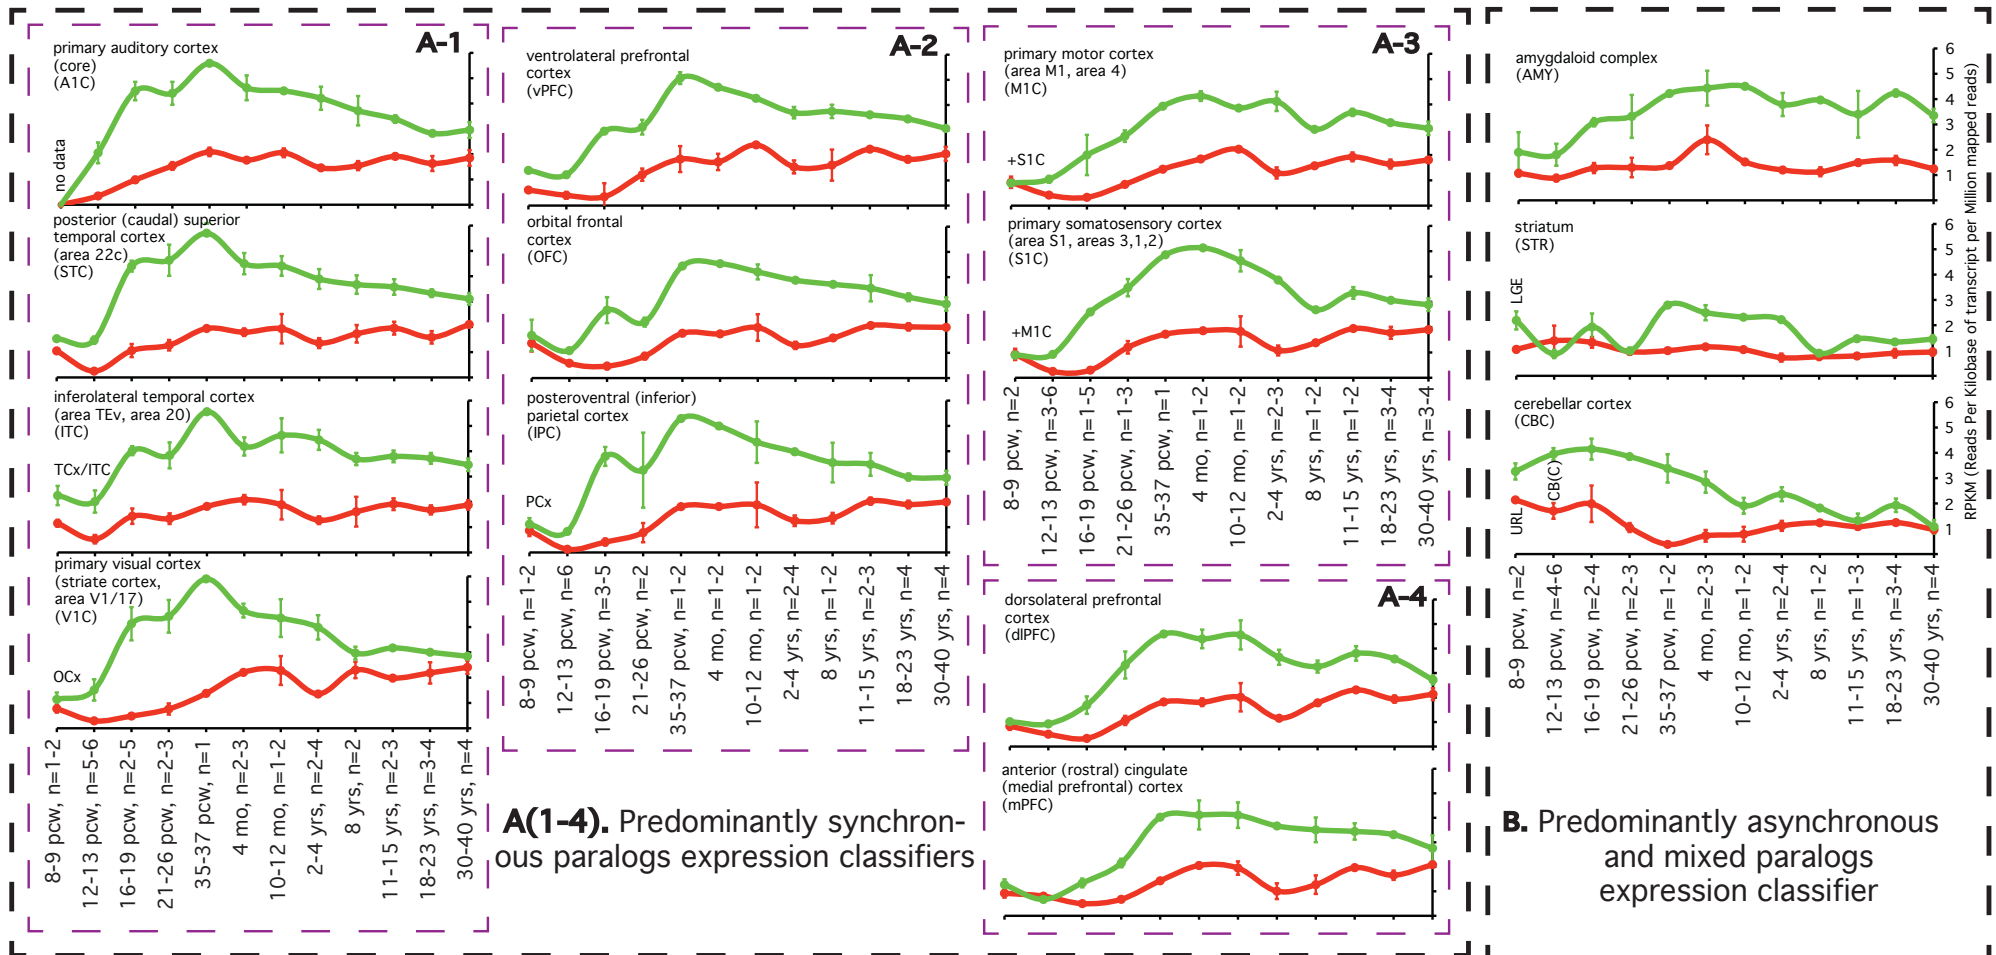

**Figure 2. *NTNG* parologs expression dynamics classification (A-C) in the human brain across the life span. A (1-4):** further subdivision of the classifier. RNA-seq data are from the BrainSpan ([www.brainspan.org](http://www.brainspan.org)) presented as a mean $\pm$ SEM. TCx = temporary neocortex; OCx = occipital neocortex; PCx = parietal neocortex; LGE = lateral ganglionic eminence; CB(C) = cerebellum(cortex); DTH = dorsal thalamus; URL = upper (rostral) rhombic limb; pcw = post-conception week. Two data points (MD, 12-13 pcw, and mPFC, 16-19 pcw) for *NTNG1* expression were omitted as they were 6-7 times different from the mean of other replicas. All processed brain samples are listed in ST2.

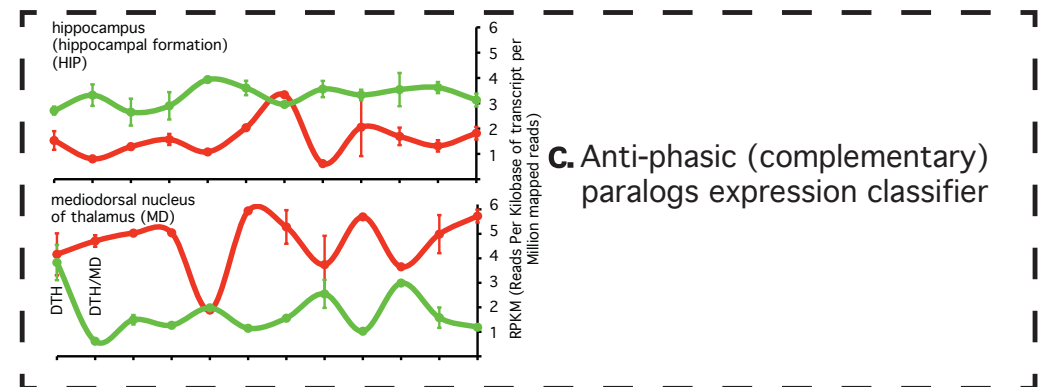

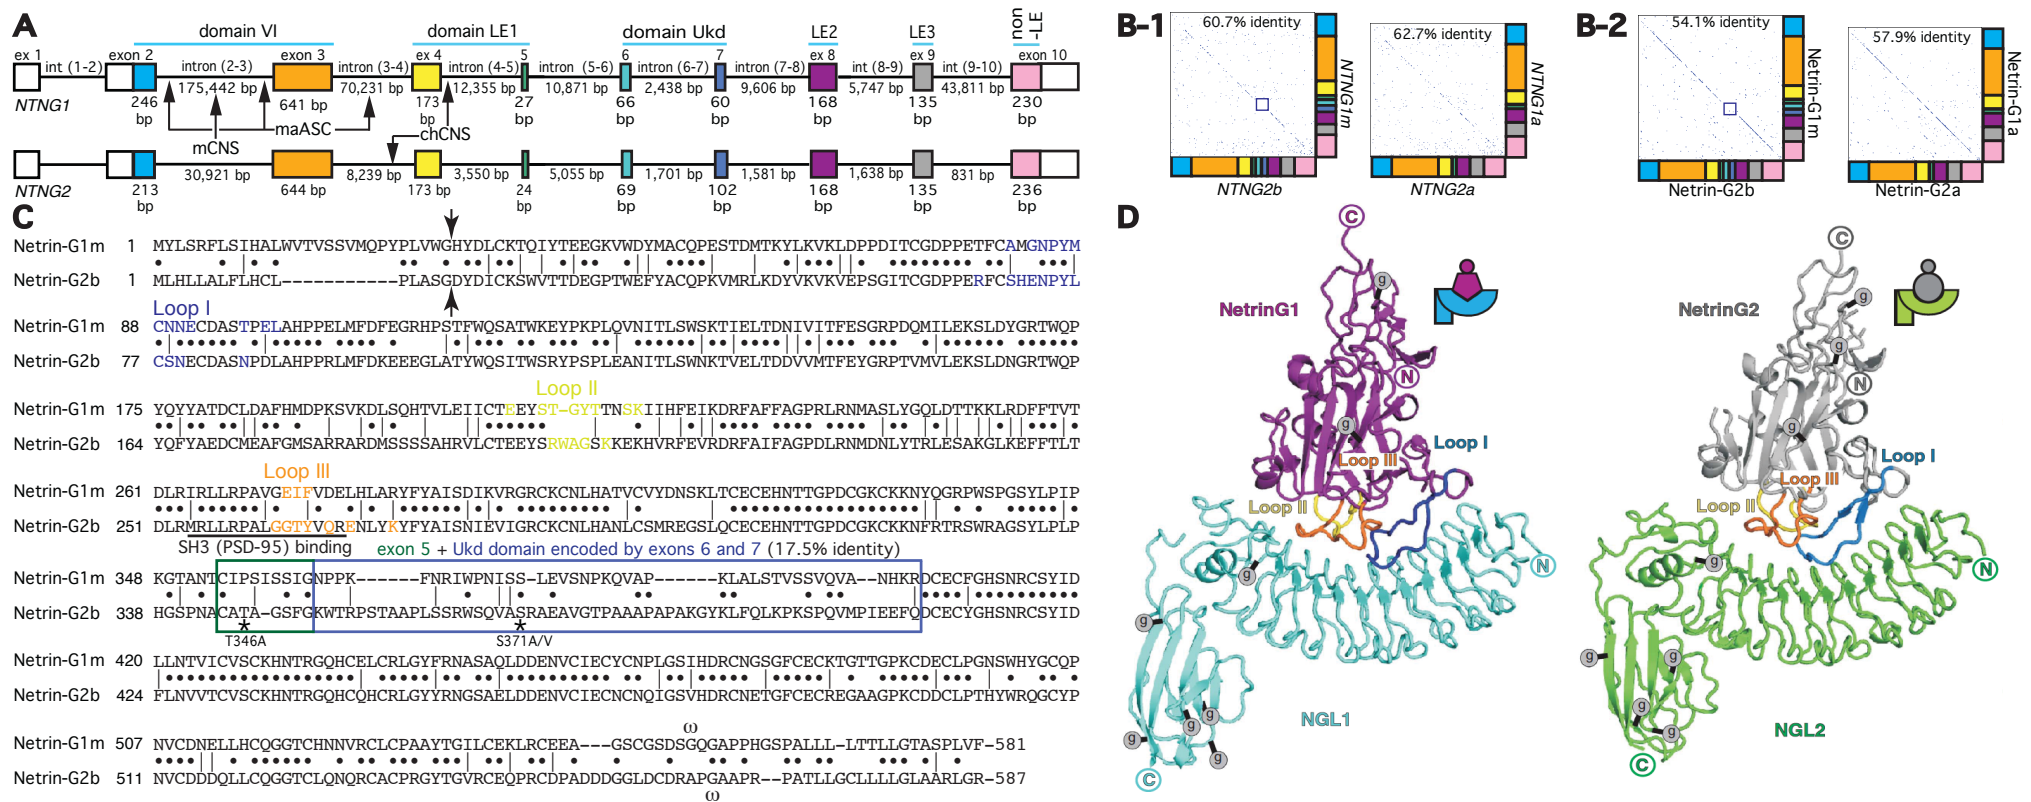

**Figure 3. Human *NTNG* paralogs DNA and protein sequence comparisons and “structure-function” rule incongruity.** (A) Identical gene structures with different sizes of introns. RNA-seq data from Figure 1B were used to precisely deduce the exon/intron junction boundaries. The sizes of exons 1, 10 and introns (1-2) are not indicated due to observed among the splice transcripts lengths variability (see ST1a for details). Arrows indicate location of CNS = conserved non-coding sequences underwent accelerated evolution in human compare to mice (mCNS) and chimpanzee (chCNS), as per Prabhakar et al., 2006; and ASC = anthropoid-specific constrained regions in human compare to marmoset (maASC), as per del Rosario et al., 2014. (B) Identical exonal composition of the longest *NTNG* encoded RNA paralog transcripts and corresponding proteins with relatively high percent of identity among them dependent on the included/excluded Ukd domain (B-2) encoded by the exons 6 and 7 (B-1). Notably, the protein sequence represents higher percent of the paralogs difference than encoded it DNA. The matrices were obtained by GeneJockey II (Biosoft). (C) Protein alignments for the longest human *NTNG* encoded proteins, Netrin-G1m and Netrin-G2b, with Loops I-III highlighting binding sites for their cognate post-synaptic binding partners NGL-1 (*Lrrc4c*) and NGL-2 (*Lrrc4*), respectively, as determined by Seiradake et al. (2011). Arrow indicates a putative secretory cleavage site location, as calculated by SignalIP (Petersen et al., 2011), the blue rectangle delineates the area of the lowest identity (3'-domain LE1+Ukd domain);  $\omega$  - denotes a point of putative GPI-attachment, as predicted by Big-PI (Eisenhaber et al., 2000). PSD-95 interaction site via the SH3-binding domain (Arbuckle et al., 2010, as determined for mice Netrin-G2) overlaps with the Loop III NGL-2 binding surface. Two stars indicate a modern human (T346A) and a hominin-specific (S371A/V) amino acid substitutions (Prosselkov et al., in press). (D) Identical structural motif of the Netrin-G1/NGL1 and Netrin-G2/NGL2 complexes as per Seiradake et al. (2011). The figure’s reproduction is covered by the Creative Commons license.
